1 **Title: MicroProteins miP1b/BBX30 and miP1a/BBX31 form a positive feedback loop**  
2 **with ABI5 to retard seedling establishment**

3

4 **Authors :** Deeksha Singh<sup>1</sup> and Sourav Datta<sup>1a</sup>

5

6 <sup>1</sup> Department of Biological Sciences, Indian Institute of Science Education and Research  
7 Bhopal, Bhopal-462066, Madhya Pradesh, India.

8 <sup>a</sup> Corresponding author

9

10

11

12

13

14

15 **One sentence Summary:** Two microProteins stabilise and activate ABI5 to cause post-  
16 germination growth arrest.

17

18 **Keywords:**

19 MicroProteins, BBX30, BBX31, ABI5, ABA(Abscisic acid), post-germination

20

21 **Author contributaion:**

22 SD and DS conceived the project. DS planned and performed all the experiments. SD wrote  
23 the manuscript with help from DS. DS and SD analysed the data and helped preparing the  
24 final manuscript.

25

26

27

28 **Abstract:**

29 In plants the switch to autotrophic growth involves germination followed by post-germination  
30 seedling establishment. When the environmental conditions are not favourable the stress  
31 hormone Abscisic Acid (ABA) signals plants to postpone seedling establishment by inducing  
32 the expression of the transcription factor ABI5. The levels of ABI5 determine the efficiency  
33 of the ABA mediated post-germination developmental growth arrest. The molecular  
34 mechanisms regulating the stability and activity of ABI5 during the transition to light is less  
35 known. We found that two microProteins miP1a/ BBX31 and miP1b/BBX30 along with  
36 ABI5 inhibit post-germination seedling establishment in a partially interdependent manner.  
37 MicroProteins are single-domain proteins that interact with multi-domain proteins to  
38 modulate their post-translational activity. miP1a/ BBX31 and miP1b/BBX30 physically  
39 interact with ABI5 to stabilize it and promote its binding to promoters of downstream genes  
40 in light. ABI5 reciprocally induces the expression of *BBX30* and *BBX31* by directly binding  
41 to their promoter. ABI5 and the two microProteins thereby form a positive feedback loop to  
42 promote ABA-mediated developmental arrest of seedlings. Our study highlights the  
43 functional versatility of microProteins which can act as regulators of crucial developmental  
44 transitions in plants as well as other eukaryotes.

45  
46  
47  
48  
49  
50  
51  
52  
53  
54  
55  
56  
57  
58  
59  
60  
61  
62  
63  
64  
65  
66  
67  
68  
69  
70  
71

72 **Introduction:**

73 Growth is a fundamental characteristic of all living organisms. However, organisms invest  
74 energy in growth only after their survival is ensured. In seed plants, just after germination,  
75 the seed needs to make a crucial decision whether to proceed with seedling development or  
76 not, based on the environmental conditions. This decision involves an interplay of signals  
77 modulated by endogenous hormones and external factors. A post-germination developmental  
78 checkpoint arrests the growth of seedlings when conditions are not favorable. One of the key  
79 phytohormones that regulates germination and early plant development is Abscisic Acid  
80 (ABA) (Weitbrecht et al., 2011; Lopez-Molina et al., 2001). It is also known as the stress  
81 hormone that inhibits plant growth during times of stress. Among the external factors that  
82 regulate seed germination and post-germination development, light plays a crucial role (Xu et  
83 al., 2014). The role of ABA and light in regulating germination, indicated by the emergence  
84 of the radicle, is quite well studied. Seedling establishment, as determined by the presence of  
85 open green cotyledons, has traditionally been studied as part of the germination process.  
86 However, several studies indicate that these two consecutive steps are developmentally  
87 distinct and regulated by common as well as unique factors (Lopez-Molina et al., 2001).  
88 Light promotes the autotrophic establishment of seedlings (Neff and Volkenburgh, 1994;  
89 Chattopadhyay et al., 1998; Deng et al., 1991; Chen et al., 2008a). The molecular  
90 understanding of the interplay between ABA and light to regulate post-germination seedling  
91 establishment is limited.

92 Abiotic stress signals induce the accumulation of ABA by elevating its biosynthesis and  
93 inhibiting its catabolism. ABA-deficient mutants germinate and establish faster than  
94 wildtype, whereas ABA catabolism mutants accumulate more ABA and exhibit longer  
95 dormancy periods (Tuteja, 2007; Xiong et al., 2002; Shu et al., 2018). ABA-induced by stress  
96 is perceived and channeled through a signaling pathway to induce changes in gene expression  
97 that ultimately lead to different stress responses. Studies utilizing the exogenous application  
98 of ABA have allowed us to understand better the ABA signaling pathway and ABA-induced  
99 responses. The ABA-signaling pathway involves the binding of ABA to PYRABACTIN  
100 RESISTANCE1 (PYR)/ PYR1-LIKE (PYL)/ REGULATORY COMPONENTS OF ABA  
101 RECEPTORS (RCAR) receptors leading to its interaction with type 2C protein phosphatases  
102 (PP2Cs). This interaction and retention of PP2Cs by ABA-bound receptors leads to the  
103 phosphorylation and release of the kinases SnRK2s, which further phosphorylate downstream  
104 transcription factors inducing ABA-mediated gene expression (Ali et al., 2020). Numerous  
105 transcription factors in Arabidopsis have been characterized for their roles in ABA signaling  
106 and response. The bZIP transcription factor ABSCISIC ACID INSENSITIVE5 (ABI5) was  
107 identified in a forward genetic screen for mutants exhibiting ABA insensitivity during  
108 germination (Finkelstein and Lynch, 2000). Although ABI5 regulates the ABA-mediated  
109 inhibition of germination, it plays a relatively more crucial role in desiccation tolerance and  
110 ABA sensitivity during post-germination development (Maia et al., 2014). ABI5 promotes  
111 post-germination arrest of seedlings to inhibit their growth and establishment under stress  
112 (Lopez-Molina et al., 2001). It binds to the G-box type ABA response elements (ABRE) on  
113 the promoters of several target genes including its promoter. EARLY METHIONINE-  
114 LABELLED 1 (EM1) and EM6, which code for LATE EMBRYOGENESIS ABUNDANT

115 (LEA) proteins, are some of the key downstream targets of ABI5 (Choi et al., 2000;  
116 Finkelstein and Lynch, 2000; Carles et al., 2002).

117 Sensitivity to ABA during post-germination seedling development is substantially modulated  
118 by light (Yadukrishnan and Datta, 2021). The interactions between the ABA and the light  
119 signaling pathway components are reciprocal and multi-layered. ABI5 forms the point of  
120 convergence of interactions with light signaling factors like PHYTOCHROME-  
121 INTERACTING FACTORS (PIFs), ELONGATED HYPOCOTYL5 (HY5), FAR-RED  
122 ELONGATED HYPOCOTYLS3 (FHY3), DE-ETIOLATED 1 (DET1), and B-box (BBX)  
123 proteins at the transcriptional level (Yadukrishnan and Datta, 2021). In the dark, the PIF  
124 proteins – PIF1, PIF3, PIF4, and PIF5 – directly bind to the *ABI5* promoter and induce its  
125 transcription (Qi et al., 2020) . Additionally, ABI5 physically interacts with PIF1 and  
126 enhances the binding of PIF1 onto the promoters of common target genes (Kim et al., 2016).  
127 The transcription factor HY5 also directly binds to the promoter of *ABI5* and promotes its  
128 expression (Chen et al., 2008a). It was recently identified that HY5 acts downstream of COP1  
129 to negatively regulate ABA-mediated inhibition of postgermination seedling development  
130 (Yadukrishnan et al., 2020). FHY3 and DET1 directly bind to the *ABI5* promoter to activate  
131 or suppress its expression respectively and thereby optimize seedling greening during early  
132 development (Tang et al., 2013). In darkness, DET1 stabilizes the PIF proteins to indirectly  
133 enhance *ABI5* expression (Dong et al., 2014). BBX proteins are B-box containing zinc finger  
134 transcription factors that regulate several aspects of light-mediated development including  
135 photomorphogenesis, flowering, shade avoidance, high light, and UV-B tolerance (Gangappa  
136 and Botto, 2014; Xu et al., 2014). Some BBX proteins play crucial roles in the light-ABA  
137 signaling crosstalk (Vaishak et al., 2019). BBX21 is a transcriptional activator of *HY5* and a  
138 positive regulator of photomorphogenesis (Datta et al., 2007; Xu et al., 2014). BBX21  
139 physically interacts with HY5 and inhibits its binding on the *ABI5* promoter (Xu et al., 2014)  
140 . BBX21 also interacts with ABI5 and prevents it from binding on its own promoter, thereby  
141 reducing *ABI5* expression (Xu et al., 2014). Moreover, BBX21 directly binds to the *ABI5*  
142 promoter and recruits a chromatin remodeler protein HRB2 (HYPERSENSITIVE TO RED  
143 AND BLUE 2) to alter the chromatin structure on the *ABI5* promoter and reduce *ABI5*  
144 transcription (Kang et al., 2018). Another B-box protein BBX19 binds to the promoter of  
145 *ABI5* and induces its expression to promote ABA-mediated inhibition of germination and  
146 seedling development (Bai et al., 2019). CO and COL4/BBX5 also regulate ABA signaling,  
147 although the mechanistic details need further investigation (Min et al., 2015)

148 *ABI5* function is tightly regulated post-translationally by several factors. The activity of  
149 *ABI5* is turned on by SnRK2s through phosphorylation, while it gets deactivated through  
150 dephosphorylation by PP2Cs (Nakashima et al., 2009). Furthermore, its activity is fine-tuned  
151 through modifications such as ubiquitination, sumoylation, and S-nitrosylation (Stone et al.,  
152 2006; Albertos et al., 2015; Miura and Hasegawa, 2009).The stability and activity of *ABI5*  
153 protein are also modulated by components of the light signaling pathway like COP1. *cop1*  
154 shows ABA hyposensitivity during post-germination seedling development (Yadukrishnan et  
155 al., 2020). COP1 mediates ABA-induced accumulation of *ABI5* by physically interacting  
156 with ABA-hypersensitive DCAF1 (ABD1) that targets *ABI5* for degradation. COP1  
157 ubiquitinates ABD1 to promote its degradation and thereby enhances *ABI5* protein stability  
158 in dark (Peng et al., 2022). Additionally, COP1 promotes the binding of *ABI5* to its target

159 promoters to inhibit seedling growth (Yadukrishnan et al., 2020). Regulation by  
160 microProteins has emerged as a relatively new mechanism of post-translational control of  
161 protein abundance and activity in various organisms (Rodrigues et al., 2021; Kruusvee et al.,  
162 2022; Kruusvee and Wenkel, 2022). MicroProteins are small, single-domain proteins  
163 generally less than 140 amino acids long that share sequence homology with multi-domain  
164 proteins (Hong et al., 2005; Dolde et al., 2018). ABI5 inhibits seedling establishment under  
165 unfavorable conditions when a seedling tries to emerge into the light from the darkness  
166 underneath the soil. The efficacy of this post-germination developmental growth arrest  
167 depends on the levels of ABI5 (Lopez-Molina et al., 2003). How the stability of ABI5 is  
168 regulated, especially under light, and factors modulating its activity is relatively less  
169 understood.

170 Here we found that the two light inducible microProteins BBX31/miP1a and BBX30/miP1b  
171 and ABI5 arrest post-germination seedling development in an interdependent manner. ABI5  
172 directly binds to the promoter of *BBX30* and *BBX31* and induces their transcription. BBX30  
173 and BBX31 physically interact with ABI5 and promote its stabilization. BBX30 and BBX31  
174 also enhance ABI5-mediated gene expression by promoting the binding of ABI5 on its target  
175 promoters. Taken together our study suggests that ABI5 and the microProteins BBX30 and  
176 BBX31 arrest seedling growth by a positive feedback mechanism.

177

## 178 **Results**

### 179 **BBX30 and BBX31 promote ABA-mediated inhibition of post-germination seedling** 180 **development**

181 *BBX30* and *BBX31* are well-characterized light-responsive genes playing roles in  
182 photomorphogenesis, UV-B signaling, and flowering (Heng et al., 2019; Yadav et al., 2019;  
183 Graeff et al., 2016). In one of our previous studies, we found that the expression of several  
184 genes involved in ABA response and desiccation tolerance was upregulated in *35S:BBX31*  
185 (Yadav et al., 2019). In another study, similar genes were downregulated in *bbx30bbx31*  
186 (Heng et al., 2019). *BBX30* and *BBX31* expression is also upregulated by ABA (Xu et al.,  
187 2019). The promoter sequences of *BBX30* and *BBX31* contain Abscisic Acid (ABA) response  
188 elements (ABRE). All of these prompted us to ask the question if these genes might be  
189 regulated by ABA to modulate stress responses. We started studying seedling development,  
190 considering the broad function of these microproteins in regulating early developmental  
191 responses. We grew imbibed seeds of Col-0, *bbx30*, *bbx31*, *bbx30bbx31*, *BBX30OE*, and  
192 *BBX31OE* on a half-strength MS plate, in the presence (+) or absence (-) of ABA. Seedlings  
193 with open green cotyledons were used to calculate % seedling establishment. In (-) ABA  
194 conditions we did not find significant difference in the % seedling establishment of Col-0,  
195 *bbx30*, *bbx31*, *bbx30bbx31*, *BBX30OE*, and *BBX31OE*. Seedlings of all the genotypes  
196 showed 100% seedling establishment by 3<sup>rd</sup> day after stratification (DAS) (Figure 1, A-C).  
197 However, the % seedling establishment in +ABA conditions was higher in *bbx30*, *bbx31* and  
198 *bbx30bbx31* and substantially lower in *BBX30OE* and *BBX31OE* compared to Col-0 (Figure  
199 1, A, D and E). In order to verify if the difference in seedling establishment rate is due to  
200 differences in germination, we determined the % germination by counting seeds with emerged  
201 radicle in (-) and (+) ABA conditions. However we did not find difference in % germination  
202 among the genotypes in either (-) or (+) ABA containing plates. Seedlings of all the

203 genotypes exhibit 100% germination by the 2<sup>nd</sup> day after stratification (DAS) in -ABA  
 204 conditions while total germination is achieved at 4 DAS under +ABA conditions  
 205 (Supplemental Figure S1, A-D). This suggests that BBX30 and BBX31 promote ABA-

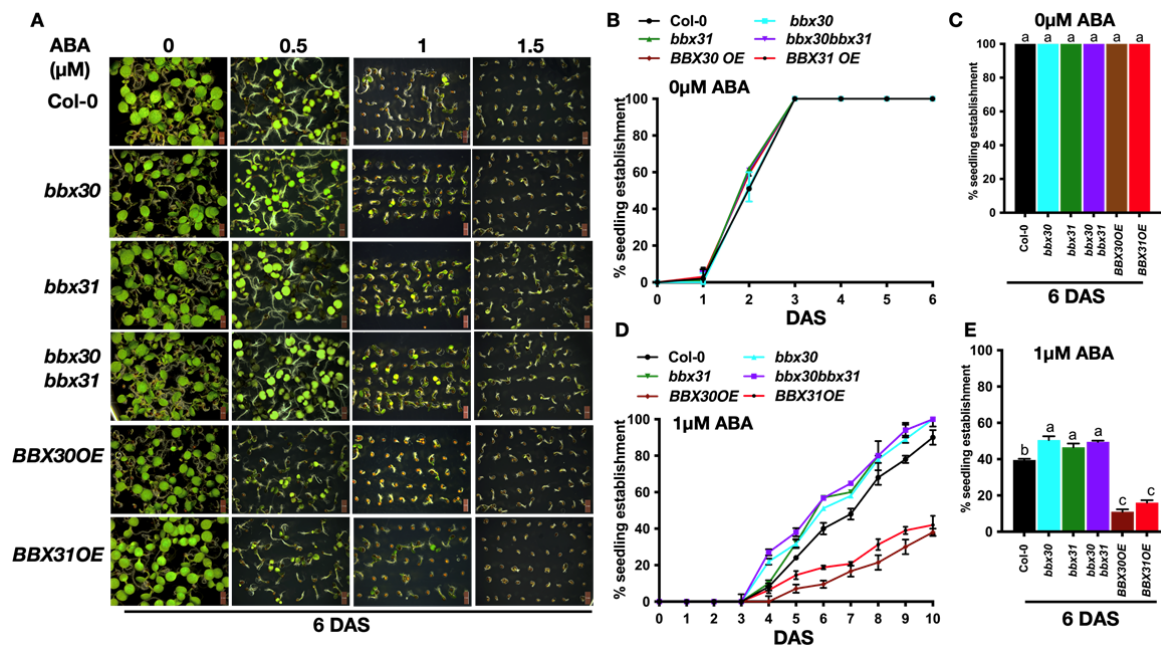

206 mediated inhibition of seedling development at the post-germination stage.

207

208

209 **Figure 1. BBX30 and BBX31 promote ABA-mediated inhibition of post-germination**  
 210 **seedling development**

211 A, Representative images of 6-day-old seedlings of Col-0, *bbx30*, *bbx31*, *bbx30bbx31*,  
 212 *BBX30OE* and *BBX31OE* grown on a 0.5x MS plate supplemented with 0 μM, 0.5 μM, 1 μM,  
 213 1.5 μM of ABA. B, C. The percentage (%) of seedling establishment in -ABA (0 μM)  
 214 conditions for the indicated genotypes for up to 6 days after stratification (DAS) and on day 6  
 215 (C). D, E, % seedling establishment in +ABA (1 μM) conditions for the indicated genotypes  
 216 for up to 10 days after stratification (DAS)(D) and on day 6 (E). Seedlings with open, green  
 217 cotyledons were counted to determine % seedling establishment. In (B-E) Error bars  
 218 represent SEM of three independent experiments with >100 seeds per experiment. In (C) and  
 219 (E) letters above the bar indicate the statistical groups as determined by one-way ANOVA  
 220 followed by Tukey's *post hoc* test ( $p < 0.05$ ).

221

222 **BBX30, BBX31 and ABI5 mediate post-germination seedling growth arrest in an inter**  
 223 **dependent manner**

224

225 The transcription factor ABI5 is a key regulator of several ABA responses including post-  
 226 germination development and is known to mediate interplay with light signaling factors  
 227 (Chen et al., 2008b; Yadukrishnan et al., 2020; Lopez-Molina et al., 2001). We asked the  
 228 question if ABI5 plays any role in BBX30 and BBX31 mediated seedling growth arrest. In  
 229 presence of ABA, % seedling establishment up to 8 DAS is higher in *abi5-8* compared to

230 Col-0, *bbx30* and *bbx31* (Figure 2, A, D and E). This difference was not seen in -ABA  
 231 conditions (Figure 2, A, B and C). In order to examine the genetic interaction between  
 232 *BBX30*, *BBX31* and *ABI5* we generated *bbx30abi5-8* and *bbx31abi5-8* by crossing and  
 233 monitored the seedling establishment rates of the double mutants under ABA. The  
 234 establishment rates in *bbx30abi5-8*, and *bbx31abi5-8* were similar to *abi5-8* suggesting that  
 235 *BBX30* and *BBX31* regulate these processes in an *ABI5*-dependent fashion (Figure 2, A-E).  
 236 There was no difference in the % germination among these genotypes in (-) ABA conditions,  
 237 with all genotypes attaining 100% germination by 2 DAS (Supplemental Figure S2, A and  
 238 B). In (+) ABA conditions at 2 DAS % germination was higher in *abi5-8*, *bbx30abi5-8*, and  
 239 *bbx31abi5-8* compared to Col-0, *bbx30* and *bbx31*, however by 5 DAS there was no  
 240 significant difference in the germination % between the genotypes (Supplemental Figure S2,  
 241 C and D).  
 242

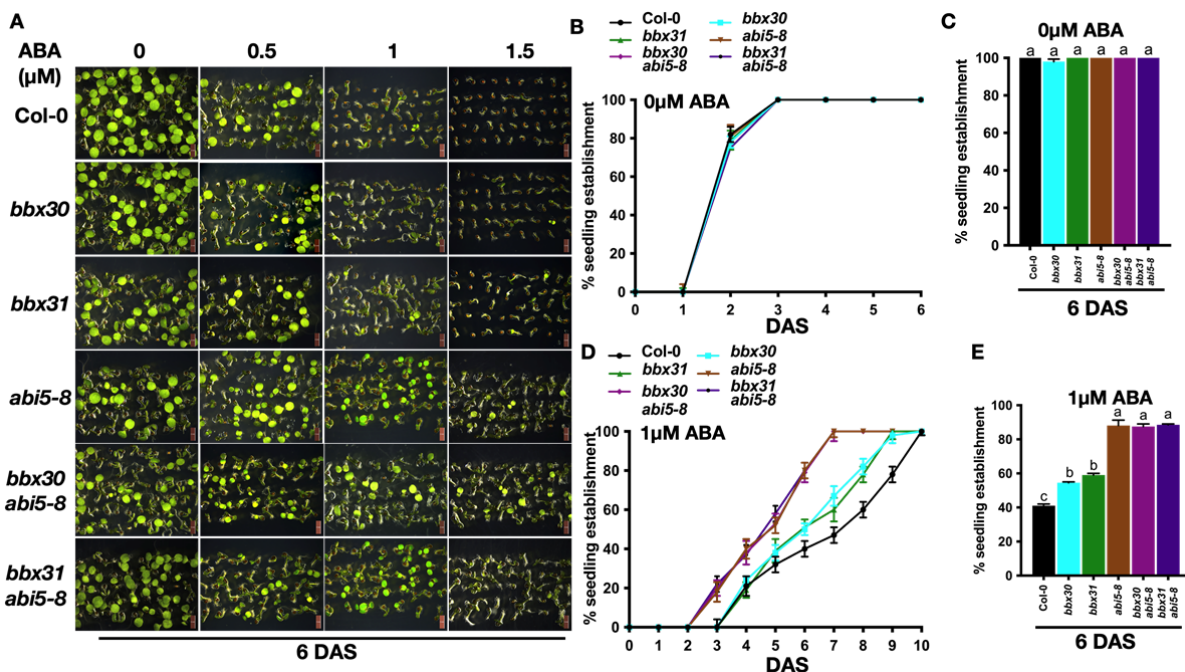

243  
 244 **Figure 2. *BBX30*, *BBX31* and *ABI5* interact genetically to regulate early development in**  
 245 **Arabidopsis**

246 A, Representative images of 6 day-old seedlings of Col-0, *bbx30*, *bbx31*, *abi5-8*, *abi5-*  
 247 *8bbx30*, *abi5-8bbx31* grown on a 0.5x MS plate supplemented with 0μM, 0.5μM, 1μM,  
 248 1.5μM of ABA. B, C, % seedling establishment in -ABA (0μM) conditions for the indicated  
 249 genotypes for up to 6 days after stratification (DAS) (B) and at day 6 (C). D, E, % seedling  
 250 establishment in +ABA (1μM) conditions for the indicated genotypes for up to 10 days after  
 251 stratification (DAS) (D) and at day 6 (E). Seedlings with open, green cotyledons were  
 252 counted to determine % seedling establishment. In (B-E) error bar represents SEM of three  
 253 independent experiments with >100 seeds per experiment. In (C) and (E) letters above the bar  
 254 indicate the statistical groups as determined by one-way ANOVA followed by Tukey's *post*  
 255 *hoc* test ( $p < 0.05$ ).  
 256

257 We further crossed *BBX31OE* with *abi5-8* to obtain *abi5-8BBX31OE* and studied their ABA  
 258 sensitivity during early seedling development (Figure 3A). There is no significant difference  
 259 in the germination rates of Col-0, *abi5-8*, *BBX31OE* and *abi5-8BBX31OE* by 5 DAS in  
 260 presence or absence of ABA (Supplemental Figure S3, A and B). However, at 6 DAS under  
 261 1 $\mu$ M ABA, *abi5-8* and *BBX31OE* exhibit 85% and 15% seedling establishment respectively  
 262 as compared to 40% in Col-0 (Figure 3, D and E). Seedling establishment % in *abi5-8BBX31OE*  
 263 is around 70% (Figure 3, D and E). There is no difference in the % seedling  
 264 establishment between the genotypes under 0 $\mu$ M ABA (Figure 3, B and C). These data  
 265 further validate that BBX31-mediated inhibition of post-germination seedling development is  
 266 at least partially ABI5 dependent.

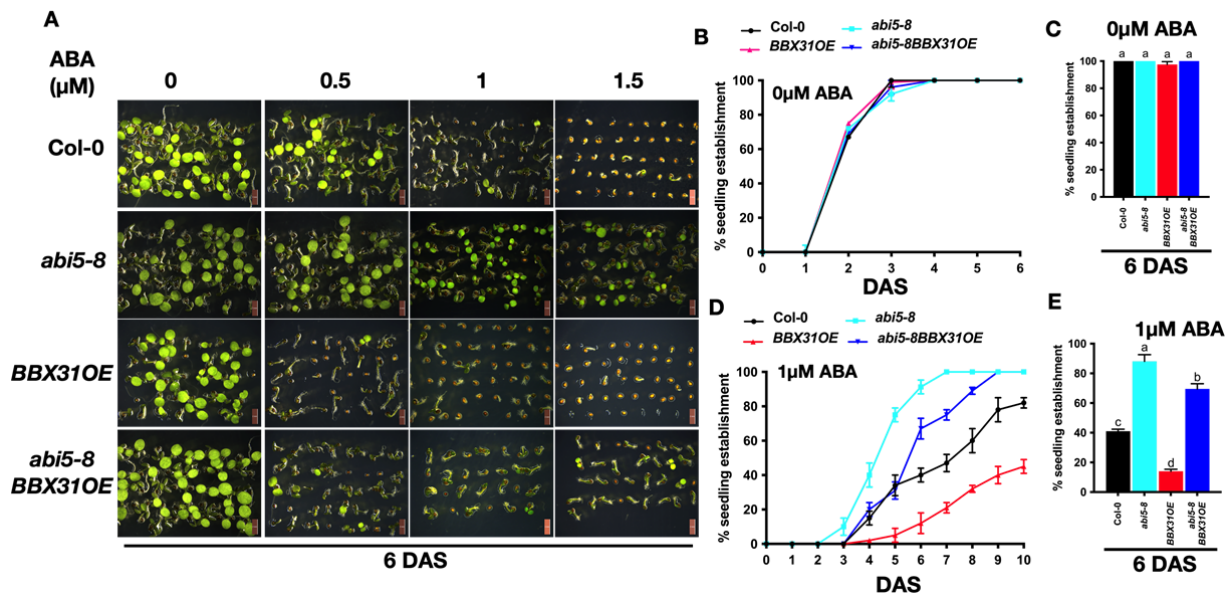

267

268

269 **Figure 3. BBX31 regulates seedling growth arrest in an ABI5-dependent fashion**

270 A, Representative images of 6-day-old seedlings of Col-0, *abi5-8*, *BBX31OE*, *abi5-8BBX31OE*  
 271 grown on a 0.5x MS plate supplemented with 0 $\mu$ M, 0.5 $\mu$ M, 1 $\mu$ M, 1.5 $\mu$ M of  
 272 ABA. B, C, % seedling establishment in -ABA (0 $\mu$ M) conditions for the indicated genotypes  
 273 for up to 6 days after stratification (DAS) (B) and at day 6 (C). D, E, % seedling  
 274 establishment in +ABA (1 $\mu$ M) conditions for the indicated genotypes for up to 10 days after  
 275 stratification (DAS) (D) and at day 6 (E). Seedlings with open, green cotyledons were  
 276 counted to determine % seedling establishment. In (B-E) Error bars represent SEM of three  
 277 independent experiments with >100 seeds per experiment. In (C) and (E) letters above the bar  
 278 indicate the statistical groups as determined by one-way ANOVA followed by Tukey's *post*  
 279 *hoc* test ( $p < 0.05$ ).

280

281 Next, we set up genetic crosses of *ABI5* overexpression line (*ABI5OE*) with *bbx30*, *bbx31*,  
 282 and *bbx30bbx31* to generate *bbx30ABI5OE*, *bbx31ABI5OE*, and *bbx30bbx31ABI5OE* lines,  
 283 respectively. Under 0 $\mu$ M ABA, germination and seedling establishment of all the genotypes  
 284 progressed at similar rates till attaining 100% (Figure 4, B and C, Supplemental Figure 4, A



285 and B). In presence of 1 $\mu$ M ABA, *ABI5OE* exhibited lower rate of seedling establishment as  
 286 compared to the wildtype (Figure 4, D and E). Interestingly, *bbx30ABI5OE*, *bbx31ABI5OE*,  
 287 and *bbx30bbx31ABI5OE* lines showed higher seedling establishment compared to *ABI5OE*  
 288 (Figure 4, D and E). We observed similar growth pattern among the genotypes in 0.5 and 1.5  
 289  $\mu$ M ABA ((Figure 4, A). In 1 $\mu$ M ABA, *ABI5OE* showed lower % germination compared to  
 290 Col-0, which was partially complemented in *bbx30ABI5OE*, *bbx31ABI5OE*, and  
 291 *bbx30bbx31ABI5OE* lines at 2 DAS (Supplemental Figure 4, C and D). All these findings  
 292 together suggest that the BBX proteins BBX30 and BBX31 are required for ABI5-mediated  
 293 seedling growth arrest. This further suggests that the dependence of ABI5 on BBX30 and  
 294 BBX31 is probably at the protein level, as the reduced seedling establishment phenotype of  
 295 seedlings constitutively expressing *ABI5* is partially rescued by the loss of *BBX30* and  
 296 *BBX31*.  
 297

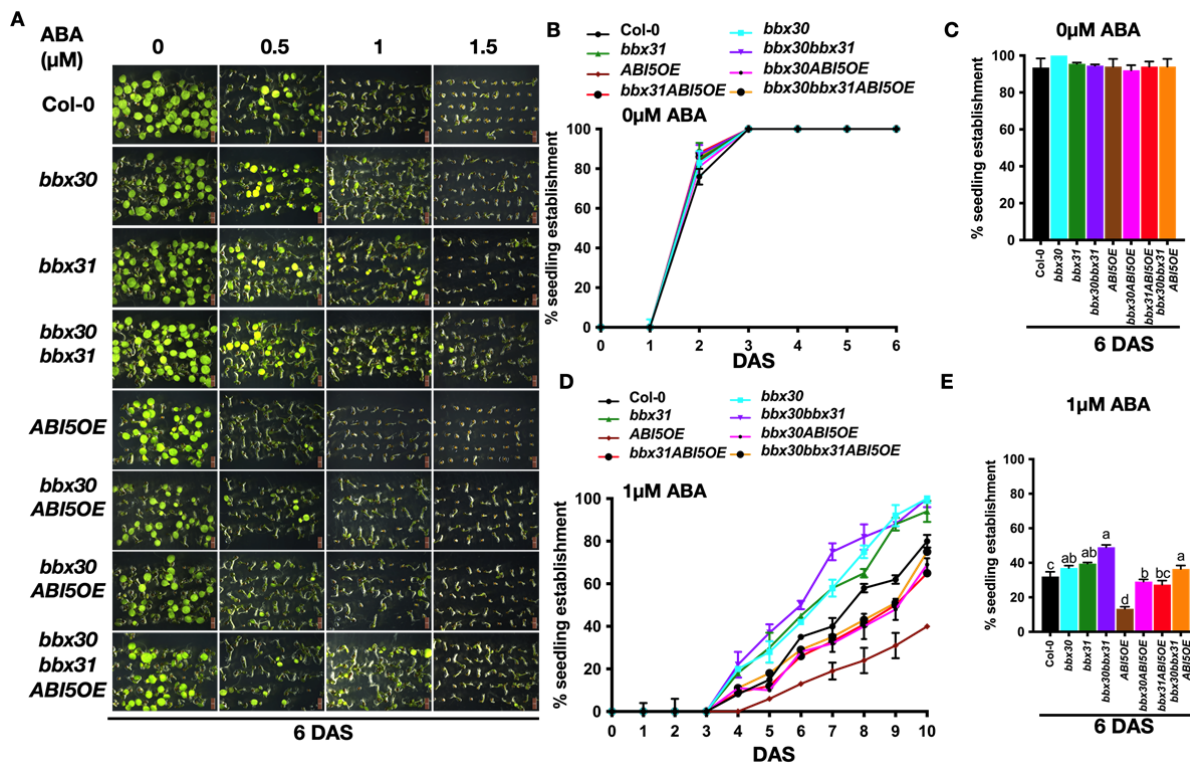

298

299

300 **Figure 4. BBX30 and BBX31 are required for ABI5-mediated seedling growth arrest**

301

302 A, Representative images of 6-day-old seedlings of Col-0, *bbx30*, *bbx31*, *bbx30bbx31*,  
 303 *ABI5OE*, *bbx30ABI5OE*, *bbx31ABI5OE*, *bbx30bbx31ABI5OE* grown on a 0.5x MS plate  
 304 supplemented with 0 $\mu$ M, 0.5 $\mu$ M, 1 $\mu$ M, 1.5 $\mu$ M of ABA. B, C, % seedling establishment in -  
 305 ABA (0 $\mu$ M) conditions for the indicated genotypes for up to 6 days after stratification (DAS)  
 306 (B) and at day 6 (C). D, E, % seedling establishment in +ABA (1 $\mu$ M) conditions for the  
 307 indicated genotypes for up to 10 days after stratification (DAS) (D) and at day 6 (E).  
 308 Seedlings with open, green cotyledons were counted to determine % seedling establishment.

309 In (B-E) Error bars represent SEM of three independent experiments with >100 seeds per  
310 experiment. In (C) and (E) letters above the bar indicate the statistical groups as determined  
311 by one-way ANOVA followed by Tukey's *post hoc* test ( $p < 0.05$ ).

312

### 313 **ABI5 physically interacts with BBX30 and BBX31**

314

315 Since constitutive overexpression of *ABI5* could not enhance ABA response in the absence of  
316 *BBX30* and *BBX31*, we hypothesized that BBX30 and BBX31 might interact with ABI5  
317 protein and regulate its activity. In order to confirm physical interaction between ABI5 and  
318 the BBX proteins we used yeast two-hybrid, in vitro pull down and BiFC assays. Our yeast-  
319 two-hybrid assay using ABI5 as bait and either BBX30 or BBX31 as prey indicated that  
320 ABI5 can physically interact with both BBX30 and BBX31 (Figure 5, A). According to  
321 previous studies ABI5 contains conserved domains, that govern specific functions (Lopez-  
322 Molina et al., 2003; Finkelstein and Lynch, 2000). We examined the interaction of BBX31  
323 with different domains of ABI5, and observed that the conserved C1 domain of ABI5 is  
324 required for the interaction with the N-terminal of BBX31 (Supplemental Figure 5, A and B).  
325 To further confirm the interaction between BBX30, BBX31 and ABI5, we performed in-  
326 vitro pull-down experiment using full length ABI5 fused to GST, and BBX30 and BBX31  
327 proteins fused to 6xHis epitope. GST-ABI5 was able to pull down His-tagged BBX30 and  
328 BBX31, validating that BBX30 and BBX31 physically interact with ABI5 in vitro (Figure 5,  
329 B). We also validated the interaction of these proteins in vivo using bimolecular fluorescence  
330 complementation (BiFC) in *Nicotiana benthamiana* (Figure 5C). All these data together  
331 suggest that ABI5 physically interacts with BBX30 and BBX31.

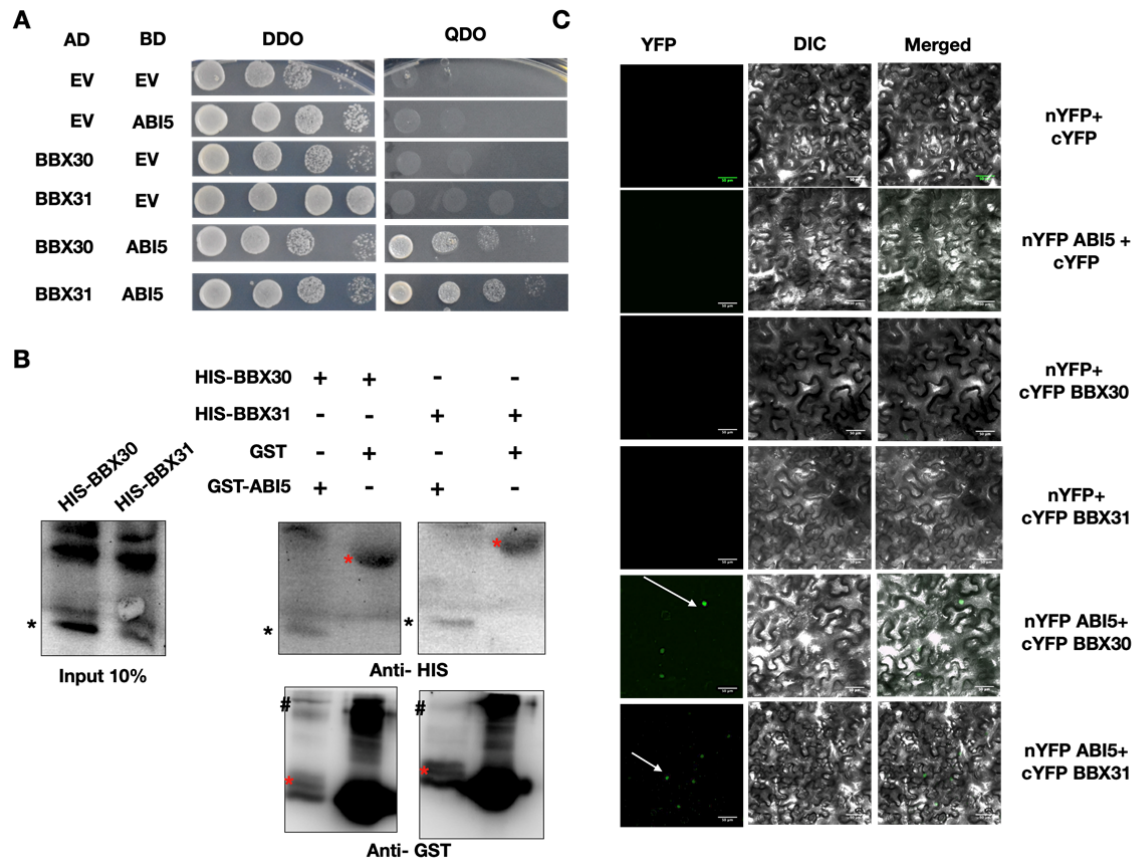

332

333

334

335 **Figure 5. ABI5 physically interacts with BBX30 and BBX31**

336 A, Yeast two-hybrid assay showing the interaction between BBX30, BBX31 and ABI5.

337 pGADT7 (AD) and pGBKT7 (BD) represent the GAL4 activation domain and binding

338 domain respectively. EV indicates empty AD or BD vector. BBX30 and BBX31 were fused

339 to AD, while ABI5 was fused with BD and tested for interaction. DDO represents the

340 medium lacking leucine and tryptophan, while QDO additionally lacks histidine and adenine.

341 B, In-vitro pull-down assay showing the interaction between BBX30, BBX31 with ABI5.

342 BBX30 and BBX31 were fused with N-terminal HIS tag, while ABI5 is fused with N

343 terminal GST tag. To check the physical interaction bead-bound GST and GST-ABI5 were

344 used to pull down His-BBX30 and His-BBX31. Precipitated proteins were analysed by anti-

345 GST and anti-His antibodies. \* mark indicate band specific to BBX30 and BBX31, #

346 indicates GST-ABI5 corresponding band, \*(red) indicate non-specific band. C, BiFC assay

347 showing the interaction of BBX30 and BBX31 with ABI5 in planta. nYFP and cYFP

348 represent the N-terminal and C-terminal half of yellow fluorescent protein. Vectors in the

349 indicated combinations were transformed into *Agrobacterium* and co-infiltrated into the 3-

350 weeks-old *N. benthamiana* leaves and imaged after 36 hours. The scale bar represents 50µm.

351

352 **BBX30 and BBX31 stabilize ABI5 during post-germination development**

353

354 BBX30 and BBX31 belong to the group of microProteins that can sequester other proteins  
355 and often regulate their stability (Wu et al., 2020; Graeff et al., 2016). Our protein-protein  
356 interaction studies indicated that BBX30 and BBX31 physically interact with ABI5 (Figure  
357 5). In order to understand the physiological significance of this interaction, we examined if  
358 BBX30 and BBX31 can regulate ABI5 protein abundance. Initially we put Col-0 and  
359 *bbx30bbx31* seeds on plates containing 0 $\mu$ M and 1 $\mu$ M ABA and harvested samples every day  
360 for up to 4 days after stratification and determined ABI5 accumulation by immunoblotting  
361 (Supplemental Figure 6, A and B). ABI5 accumulated to high levels on day 1 in both Col-0  
362 and *bbx30bbx31* (Supplemental Figure 6, A and B). In -ABA conditions ABI5 accumulation  
363 in day 2, 3 and 4 samples in both the genotypes was decreased (Supplemental Figure 6, A and  
364 B). In presence of ABA, ABI5 accumulation was detected on day 2, 3 and 4 samples in Col-0  
365 but not in *bbx30bbx31* (Supplemental Figure 6, A and B). This suggests that BBX30 and  
366 BBX31 might regulate the stability of ABI5 especially during post-germination development.  
367 To check the dynamics of ABI5 protein accumulation upon ABA treatment during post-  
368 germination development, we treated germinated seeds of Col-0, *bbx30bbx31*, and *BBX31OE*  
369 with 10 $\mu$ M ABA for 1, 6, and 12 hours and harvested samples to determine ABI5 protein  
370 levels (Figure 6, A-D). ABI5 accumulation was lower in *bbx30bbx31* compared to Col-0,  
371 whereas in *BBX31OE* enhanced accumulation of ABI5 was detected (Figure 6, A-D). Similar  
372 ABA treatment causes a gradual increase in the ABI5 accumulation in *ABI5OE*, while this is  
373 compromised in *bbx30 bbx31 ABI5OE*, suggesting that these BBX proteins promote ABA  
374 mediated post-germination ABI5 accumulation (Figure 6E). Previous reports have shown that  
375 ABI5 protein undergoes degradation via the 26S proteasomal pathway (Lee et al., 2010;  
376 Stone et al., 2006). Inhibition of 26S proteasome pathway by treating the germinated seeds  
377 with MG132 for 6 hours prevented the decrease of ABI5 levels in *bbx30bbx31*, suggesting  
378 that BBX30 and BBX31 might promote ABI5 accumulation by negatively regulating its  
379 degradation (Figure 6, F). To uncouple the effects of de novo translation on ABI5 levels in  
380 these genotypes, we treated the germinated seeds with the translational inhibitor  
381 cycloheximide (CHX) and examined the stabilization of ABI5 in Col-0, *bbx30bbx31* and  
382 *BBX31OE* (Figure 6, G and H). The rate of degradation of ABI5 was faster in *bbx30bbx31*,  
383 while reduced in *BBX31OE* as compared to Col-0 (Figure 6, G and H). All these results  
384 together suggest that BBX30 and BBX31 promote the stabilization of ABI5 during post-  
385 germination development by negatively regulating its proteasome-mediated degradation.

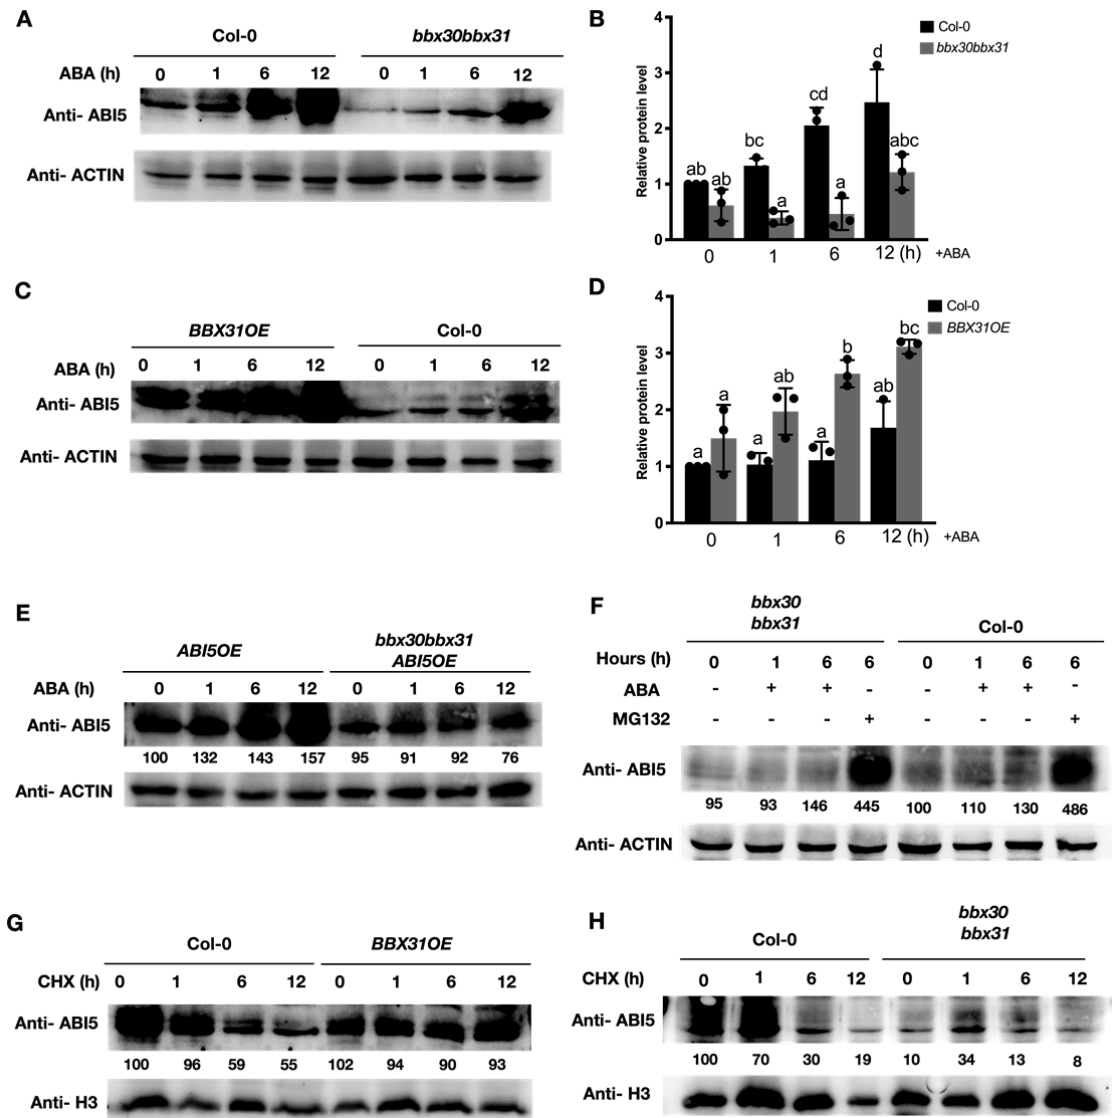

386

387

388 **Figure 6. BBX30 and BBX31 stabilize ABI5**

389 A, Immunoblot showing the abundance of ABI5 protein in Col-0 and *bbx30bbx31*. B,  
 390 Relative protein levels of ABI5 in Col-0 and *bbx30bbx31*. C, Immunoblot showing the  
 391 abundance of of ABI5 protein in *BBX31OE* and Col-0. D, Relative protein levels of ABI5 in  
 392 *BBX31OE* and Col-0. In (B) and (D) error bars represent standard deviation of two blots.  
 393 Letters above the error bar indicate the statistical groups as determined by one-way ANOVA  
 394 followed by Tukey's *post hoc* test ( $p < 0.05$ ). E, Immunoblot showing the protein level of  
 395 ABI5 in *ABI5OE* and *bbx30bbx31ABI5OE* upon ABA treatment. In (A), (C) and (E) 1-day-  
 396 old, germinated seeds were transferred from 0.5x MS -sucrose medium containing plates to  
 397 similar plates with 10 $\mu$ M ABA for indicated time intervals and then harvested and subjected  
 398 to immunoblotting using an anti-ABI5 antibody. Actin was used as an internal sample control  
 399 and blotted using an anti-ACTIN antibody. F, Immunoblot showing the level of ABI5 in

400 *bbx30 bbx31* and Col-0. Germinated seeds as in (A) were transferred to media containing  
401 0.5x MS -sucrose with 10 $\mu$ m ABA or 50 $\mu$ m MG132 for the indicated time. Samples were  
402 harvested and blotted using an anti-ABI5 antibody. Actin was used as an internal loading  
403 sample control. G, H, Immunoblot showing the protein levels of ABI5 in Col-0, *BBX31OE*,  
404 and *bbx30bbx31* upon CHX treatment. Germinated seeds were treated with 20 $\mu$ M ABA for  
405 12 hours in the presence of 100 $\mu$ M CHX and samples were harvested at different time  
406 intervals. H3 protein was used as a sample loading control. Proteins were detected using  
407 Anti-ABI5 and Anti-H3 antibody respectively. In (E-H) numbers below each blot indicate the  
408 relative band intensity of proteins that is normalized to the loading control (ACTIN/H3). The  
409 intensity of the first band was set to 100.

410

### 411 **BBX30 and BBX31 enhance ABI5-mediated gene expression by promoting the binding** 412 **of ABI5 on its target promoters**

413

414 We now asked the question if BBX30 and BBX31 can modulate ABI5 activity. ABI5 is  
415 known to directly activate its own transcription and also a range of other target genes such as  
416 *EM1* and *EM6* (Chen et al., 2008c; Xu et al., 2014; Finkelstein and Lynch, 2000; Leung and  
417 Giraudat, 1998). First, we compared the expression level of *ABI5* and *EM6*, in Col-0,  
418 *bbx30bbx31*, *bbx30*, *bbx31*, *BBX30OE*, *BBX31OE* under -ABA and +ABA conditions in  
419 tissues of two different developmental stages - in germinated seeds that have completed the  
420 radicle emergence and in developing seedlings that have started but not completed the  
421 cotyledon emergence. We observed no significant difference in the expression of *ABI5* and  
422 *EM6* between the genotypes in the germinated seeds (Figure 7, A and C). However, the  
423 emerging seedlings of *BBX30OE* and *BBX31OE* showed higher expression of *ABI5* and *EM6*  
424 as compared to Col-0 in the presence of ABA, whereas the expression was lower in the loss  
425 of function mutants (Figure 7, B and D). Furthermore, we performed a transient assay in  
426 *Arabidopsis* protoplasts using luciferase gene driven by *ABI5* promoter as the reporter and  
427 *ABI5*, *BBX30*, and *BBX31* as effectors (Figure 7, E). While the three effectors could  
428 individually induce the expression of *ABI5pro:LUC*, coexpression of *ABI5*, *BBX30*, and  
429 *BBX31* significantly increased the luciferase activity, suggesting that *BBX30* and *BBX31*  
430 enhance the transcriptional activation of target genes by *ABI5* (Figure 7, F).

431

432 Subsequently, we performed an electrophoretic mobility shift assay (EMSA) to test the effect  
433 of *BBX30* and *BBX31* on the binding of *ABI5* on its target promoters. *BBX30* and *BBX31*  
434 did not show direct binding on the promoter regions of *ABI5* and *EM6* where *ABI5* is known  
435 to bind (Figure 7, G-I) However, the addition of *BBX30* and *BBX31* along with *ABI5*  
436 resulted in a super shift as compared to *ABI5* alone, indicating that *BBX30* and *BBX31*  
437 might form a complex with *ABI5* during the latter's DNA binding (Figure 7, H and I). To test  
438 whether *BBX30* and *BBX31* influence the binding of *ABI5* on its target promoters in vivo,  
439 we performed a chromatin immunoprecipitation assay (ChIP) using anti-*ABI5* antibody,  
440 followed by qPCR using primers flanking the *ABI5*-binding sites of *EM1* and *EM6* promoters  
441 in 3 DAS seedlings of Col-0, *bbx30 bbx31*, *ABI5OE*, and *bbx30 bbx31 ABI5OE*. The  
442 enrichment of *ABI5* protein on *EM1* and *EM6* was decreased and increased in *bbx30bbx31*  
443 and *ABI5OE*, respectively, as compared to Col-0 (Figure 7, J-L). Interestingly, *bbx30 bbx31*

444 *ABI5*OE exhibited less *ABI5* protein enrichment on *EM1* and *EM6* as compared to *ABI5*OE,  
 445 suggesting that binding of *ABI5* on the target promoters is promoted by *BBX30* and *BBX31*  
 446 (Figure 7, J-L).

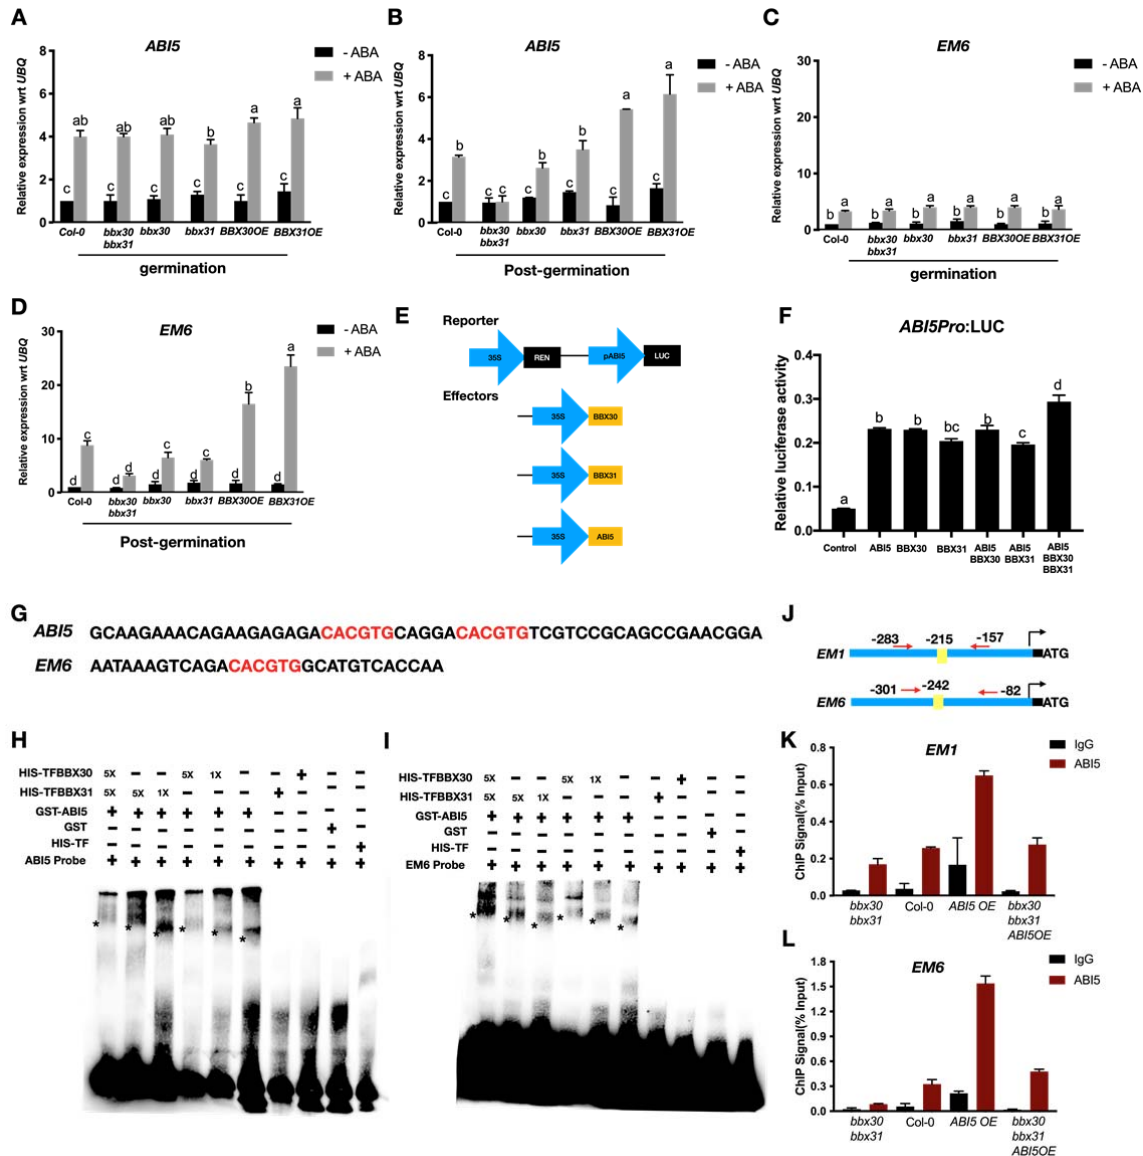

447  
 448 **Figure 7. *BBX30* and *BBX31* enhance *ABI5*-mediated gene expression by promoting the**  
 449 **binding of *ABI5* on its target promoters**  
 450 A-D, Relative expression of (A-B) *ABI5* and (C-D) *EM6* in Col-0, *bbx30 bbx31*, *bbx30*,  
 451 *bbx31*, *BBX30 OE*, *BBX31 OE*. Seeds were inoculated on 0.5x MS -sucrose plates, with or  
 452 without 1µM ABA. The seeds were harvested on the second day (germination) and the third  
 453 day (post-germination) after stratification. Values are the mean of three biological replicates.  
 454 E, Schematic representation of the constructs used in the transient assay in *Arabidopsis*  
 455 protoplast. The reporter construct used is based on the pGreen vector expressing 35S  
 456 promoter driven Renilla Luciferase and *ABI5<sub>pro</sub>* driven Luciferase. Effectors used are *ABI5*,

457 *BBX30*, *BBX31* cloned under the constitutive *35S* promoter. F, Relative luciferase activity,  
458 showing the activation of *ABI5<sub>pro</sub>: LUC* by the combination of proteins mentioned. Error bar  
459 represents SD (n=3). G, The sequence of promoter regions of *ABI5* and *EM6* used as probes  
460 for the EMSA. The red highlighted region is the G- box type ABRE *cis*-regulatory element.  
461 H, I, EMSA showing the binding of ABI5 along with BBX30 and BBX31. BBX30 and  
462 BBX31 alone, do not bind to *ABI5* and *EM6* promoters. The addition of BBX30 and BBX31  
463 in the presence of ABI5 leads to a super shift (denoted by \*) of the DNA-protein complex. +  
464 and - denotes the presence and absence of the probe or proteins indicated on the left. 1X and  
465 5X represent the concentration of BBX30 and BBX31. J, Schematic representation of *EM1*  
466 and *EM6* promoter. Black arrow represents the transcription start site. The yellow boxes  
467 indicates G-box type ABRE *cis*-regulatory elements, and the number represents the base  
468 location of G-box type elements. Red arrows denote primer binding sites for the primers used  
469 to check enrichment by qPCR following CHIP. K, L, CHIP-qPCR analysis determining the  
470 binding of ABI5 onto the promoter of (K) *EM1* and (L) *EM6* in seedlings of *bbx30bbx31*,  
471 Col-0, *ABI5OE* and *bbx30 bbx31ABI5OE*. The genotypes used were grown in 1µM ABA and  
472 samples were harvested on the third day after stratification. DNA-Protein complexes were  
473 immunoprecipitated using anti-ABI5 and anti-IgG antibodies (negative control). CHIP DNA  
474 was quantified using primers flanking the G-box region of *EM1* and *EM6*. Letters above the  
475 error bar (A-D and F) indicated the statistical groups as determined by one-way ANOVA  
476 followed by Tukey's *post hoc* test (p < 0.05).

477

#### 478 **ABI5 directly binds to the promoters of *BBX30* and *BBX31* and induces their** 479 **transcription**

480

481 *BBX30* and *BBX31* are well characterized as light-responsive genes induced during dark to  
482 light transition and are also regulated by UV-B, and the circadian clock (Yadav et al., 2019;  
483 Wu et al., 2020; Graeff et al., 2016). Since our data suggest the important role of BBX30 and  
484 BBX31 in ABA response during post-germination development, we asked whether these  
485 genes are transcriptionally regulated by ABA. We examined the expression levels of *BBX30*  
486 and *BBX31* by RT-qPCR in germinated Col-0 seeds treated with ABA for 0, 1, 6 and 12  
487 hours (Figure 8, A and B)). ABA treatment for 1 hour results in 3-fold and 12-fold  
488 upregulation in the mRNA levels of *BBX30* and *BBX31* respectively (Figure 8, A and B).  
489 Treatment with ABA for longer durations up to 12 hours results in the expression levels of  
490 *BBX30* and *BBX31* elevating to 4-folds and 15-folds compared to no ABA treatment (0 hour)  
491 (Figure 8, A and B). The G-box type ABA response elements (ABRE) present in the  
492 promoter of *BBX30* and *BBX31* are known to be the target sites of the transcription factor  
493 ABI5 that plays crucial roles in ABA signaling. To test if *BBX30* and *BBX31* are induced by  
494 ABA in an ABI5-dependent manner, we examined their expression in *abi5-8* treated similarly  
495 as explained above for Col-0. We found that the absence of ABI5 impairs the ABA-induced  
496 upregulation of *BBX30* and *BBX31* (Figure 8, A and B). All these data suggest that after  
497 germination ABA induces the expression of *BBX30* and *BBX31* in a ABI5 dependent manner.  
498 Next, we asked the question if ABI5 can directly bind to the promoter of *BBX30* and *BBX31*.  
499 To examine this, we performed EMSA using GST-ABI5 protein and biotinylated *BBX30* and  
500 *BBX31* promoter regions as the probes. GST-ABI5 was able to bind to the G-box-containing



501 promoter sequences of *BBX30* and *BBX31*, while the binding was abrogated in the probes  
 502 containing mutated G-boxes, indicating that ABI5 directly binds on the G-box elements on  
 503 the promoters of *BBX30* and *BBX31* (Figure 8, C-E). To validate the in vivo binding of ABI5  
 504 on these promoters, we also performed a ChIP-qPCR, and examined the regions of *BBX30*  
 505 and *BBX31* promoters showing ABI5 enrichment. The results indicated that ABI5 indeed  
 506 binds to *BBX30* and *BBX31* promoters on the regions containing the G-box type ABRE cis-  
 507 regulatory elements (Figure 8, F-H). These evidences suggest that while *BBX30* and *BBX31*  
 508 interact with ABI5 to stabilize it and promote the expression of downstream ABA responsive  
 509 genes, ABI5 establishes a positive feedback loop to directly activate the transcription of  
 510 *BBX30* and *BBX31* (Figure 9).  
 511

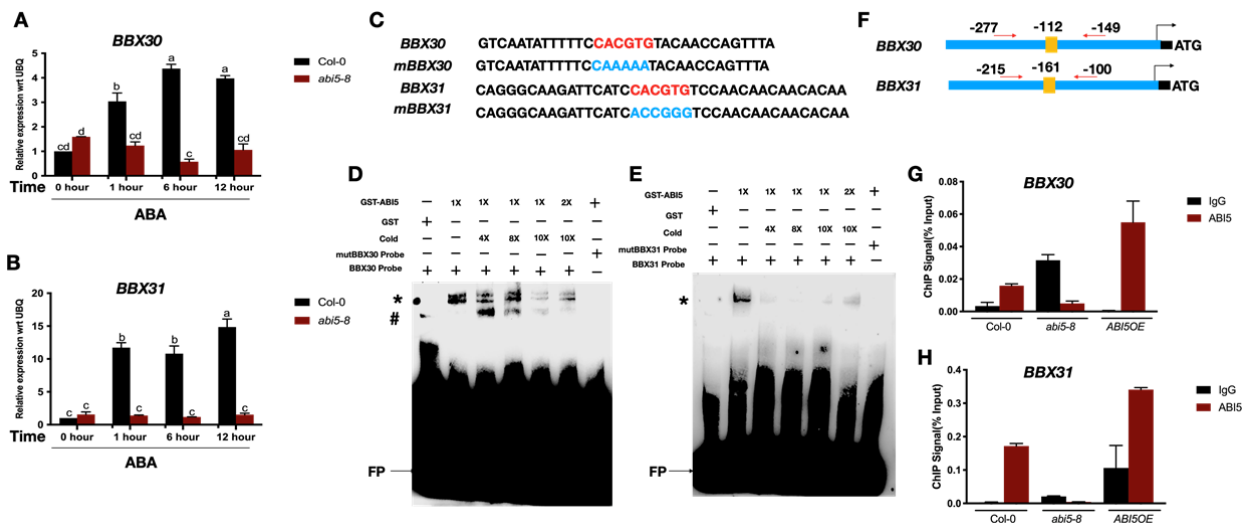

512  
 513  
 514 **Figure 8. ABI5 directly binds to the promoter of *BBX30* and *BBX31* and induces their**  
 515 **transcription**

516 A-B, The relative expression level of (A) *BBX30* and (B) *BBX31* in the Col-0 and *abi5-8*.  
 517 Seeds were germinated on 0.5xMS -sucrose conditions. 100% germinated seeds were  
 518 transferred to medium containing 10 $\mu$ M ABA. Error bars indicate SEM of two biological  
 519 replicates, the letters above the bars represent different statistical group. C, Sequence of the  
 520 probes used for EMSA, mutated nucleotides are shown in blue colour. D-E, EMSA showing  
 521 the binding of ABI5 to the promoter of *BBX30* and *BBX31*, containing the G-box domain and  
 522 labelled with biotin. *mutBBX30* and *mutBBX31* represent the mutated G-box, while + and -  
 523 indicate presence and absence; cold represents the unlabelled probes used in 4X, 8X, and  
 524 10X concentrations. FP represents a free probe. # Denotes the nonspecific shift and \*  
 525 indicates the ABI5 mediated shift. F, Schematic representation of *BBX30* and *BBX31*  
 526 promoter. Arrow represents the transcription start site. The yellow boxes indicate G-box type  
 527 ABRE cis-regulatory elements, and the number represents the base location of G-box type  
 528 regulatory elements. G-H, ChIP-qPCR analysis determining the binding of ABI5 onto the promoter of  
 529 *BBX30* and *BBX31* in seedlings of Col-0, *abi5-8*, and *ABI5OE*. The genotypes were grown in  
 530 1 $\mu$ M ABA and samples were harvested on the third day after stratification. DNA-Protein

531 complexes were immunoprecipitated using anti-ABI5 and anti-IgG antibodies (negative  
532 control). ChIP DNA was quantified using primers flanking the G-box region of *BBX30* and  
533 *BBX31*. Error bar represents the the mean  $\pm$  SEM of three technical replicates.  
534  
535

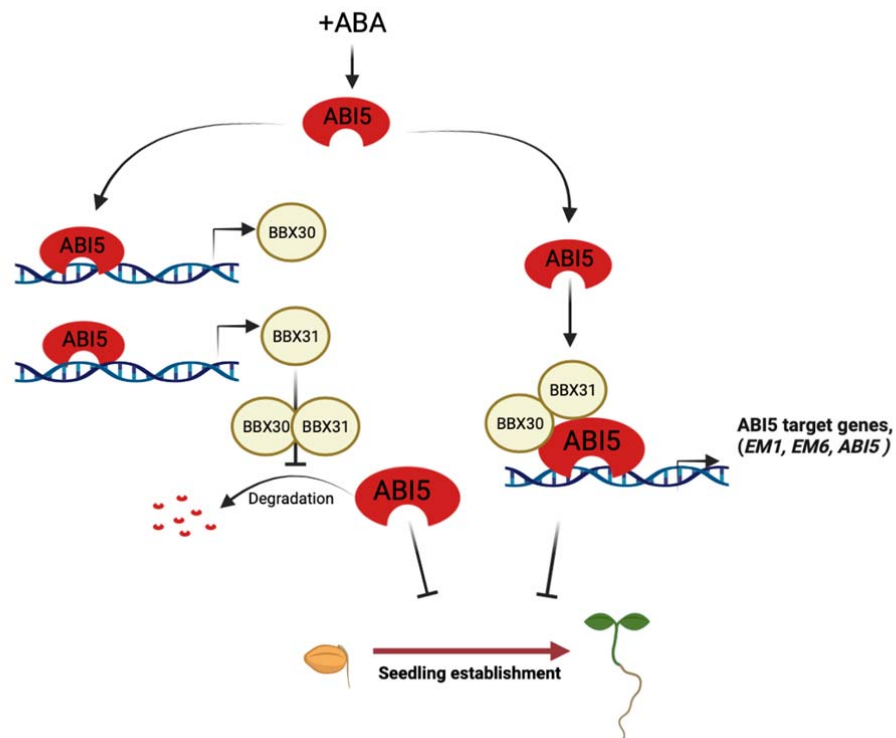

536 **Figure 9. Model showing BX30, BBX31 and ABI5 regulate post-germination seedling**  
537 **development in an interdependent manner.** BBX30 and BBX31 promote the stability of  
538 ABA-induced ABI5 by inhibiting its degradation and regulating its activity to promote  
539 expression of ABI5 target genes. ABI5 on the other hand directly binds to the promoter of  
540 *BBX30* and *BBX31* and promotes their transcription. The microproteins miP1a/BBX31 and  
541 miP1b/BBX30 alongwith ABI5 thereby form a positive feedback loop to inhibit seedling  
542 establishment.  
543

## 544 Discussion

545 Germination, seedling development and stomatal activity are among the several important  
546 developmental events regulated by both ABA and light (Yadukrishnan and Datta, 2021; Ali  
547 et al., 2020; Xu et al., 2014; Chen et al., 2008; Lau and Deng., 2007). Of these the integrated  
548 role of ABA and light in regulating early seedling development is relatively less known.  
549 ABA inhibits post-germination seedling establishment and the ABA sensitivity of seedlings  
550 is known to be modulated by light. ABI5 seems to play a key role in mediating the interplay  
551 between the light and ABA signaling pathways (Xu et al., 2014; Collin et al., 2021). Several

552 members of the light signaling pathway that are modulated by the light or dark cue, feed the  
553 light information either upstream or downstream of *ABI5*. A number of light signaling  
554 factors have been identified to bind to the promoter of *ABI5* and regulate its transcription.  
555 These include transcription factors like PIFs, DET1, HY5, BBX19, BBX21, FAR1 and  
556 FHY3 (Sakuraba et al., 2014; Penfield et al., 2010; Shi et al., 2013; Xu et al., 2014; Kang et  
557 al., 2018; Bai et al., 2019). Some other light signaling regulators can modulate *ABI5* activity  
558 at the protein level. This may be as a result of direct physical binding with *ABI5* as in the  
559 case of PIF1 or indirectly modulating *ABI5* stability by binding to its repressor ABD1 as  
560 mediated by COP1 (Peng et al., 2022). The stabilization activities of PIF1 and COP1 are  
561 limited to the dark environment. COP1 also promotes *ABI5* mediated downstream gene  
562 activation to suppress post-germination seedling establishment (Yadukrishnan et al., 2020).  
563 PIF1 and *ABI5* act in a cooperative manner to activate common downstream target genes by  
564 binding to their promoters in the dark (Kim et al., 2016). To prevent precocious seedling  
565 establishment *ABI5* needs to be active both under dark and in light. Here we identified two  
566 microProteins miP1a/BBX31 and miP1b/BBX30 that directly interact with *ABI5* to stabilize  
567 it and promote its downstream activities in the light (Figure 5, 6, 7). *ABI5* via a positive  
568 feedback loop regulates the transcription of miP1a/BBX31 and miP1b/BBX30 (Figure 8).  
569 The microProteins and *ABI5* thus mediate seedling growth arrest in an interdependent  
570 manner, at least partially (Figure 1, 2, 3, 4). This study provides a novel microprotein  
571 mediated post-translational regulatory mechanism for controlling *ABI5* accumulation and  
572 activity during post-germination seedling establishment in the absence of COP1 and PIFs that  
573 are deactivated in light.

574 BBX proteins are zinc-finger transcription factors that regulate numerous aspects of early  
575 seedling development (Yadav et al., 2020, 2020; Song et al., 2020). In *Arabidopsis* there are  
576 32 B-box proteins that are divided into five structural groups based on the domain structure  
577 (Gangappa and Botto, 2014). The structural groups I-III (BBX1-BBX17) contain a CCT  
578 domain at the C-terminal half which is often involved in DNA binding and transcriptional  
579 regulation. BBX11 regulates the accumulation of protochlorophyllide to optimize greening  
580 during de-etiolation (Job, 2020). Structural group IV contains 2 B-box domains but is devoid  
581 of the CCT domain. Four members of this group (BBX20, BBX21, BBX22, BBX23) have  
582 been characterized as positive regulators of photomorphogenesis while the other four  
583 (BBX18, BBX19, BBX24, BBX25) repress photomorphogenic development. BBX20,  
584 BBX21, BBX22 act as cofactors of HY5 to mediate light-regulated development (Bursch et  
585 al., 2020; Job et al., 2018). An M6 motif identified in the C-terminus of these proteins might  
586 regulate their specific developmental responses in response to light (Yadukrishnan et al.,  
587 2018). Structural group five consists of 7 members (BBX26-BBX32) that contain only one  
588 B-box domain. Functional characterization of these single-domain BBX proteins indicates  
589 that many of them play important roles in early seedling development. BBX30 and BBX31  
590 promote hypocotyl elongation in seedlings under visible light (Yadav et al., 2019; Heng et  
591 al., 2019). HY5 inhibits the transcription of *BBX30* and *BBX31* (Heng et al., 2019).  
592 Interestingly, BBX30 and BBX31 positively regulate *BBX28* and *BBX29* which suppresses  
593 HY5-mediated inhibition to promote the transcription of *BBX30* and *BBX31* to fine-tune  
594 photomorphogenic development (Song et al., 2020). BBX32 interacts with BBX21 and

595 suppresses the promotion of light-mediated gene expression by BBX21 and HY5 (Holtan et  
596 al., 2011). Wu et al elegantly characterized the specific role of BBX30 and BBX31 during  
597 de-etiolation (Wu et al., 2020). These two proteins inhibit the dimerization of PIF3 and EIN3  
598 to promote apical hook and cotyledon opening during the dark to light transition. It is  
599 interesting to note that other group V members BBX32, BBX28 and BBX29 promote BR-  
600 mediated cotyledon closure in the dark (Ravindran et al., 2021; Cao et al., 2022). The  
601 functional diversity between these closely related BBX proteins needs further  
602 characterization. Our study here shows that BBX30 and BBX31 inhibit post-germination  
603 seedling establishment in an ABA-dependent manner. It seems that the same proteins may be  
604 recruited for different functions depending on the presence or absence of stress conditions. In  
605 addition to their role in modulating early seedling development, BBX30 and BBX31 also  
606 regulate flowering and BBX31 promotes UV-B stress tolerance (Yadav et al., 2019; Graeff et  
607 al., 2016).

608 MicroProteins miP1a/BBX31 and miP1b/BBX30 are 121 and 117 amino acids long  
609 respectively and show 65.5% sequence identity (Graeff et al., 2016). microProteins form  
610 homodimers, heterodimers, or multimeric complexes by interacting with the protein-protein  
611 interaction domains of their targets. As of now, not more than 50 miPs have been functionally  
612 characterized in plants. In most of these cases, the microProteins repress the activity of their  
613 targets (Staudt and Wenkel, 2011). In fact, miP1a and miP1b have been previously shown to  
614 form a repressor complex together with CO and TOPLESS to inhibit flowering (Graeff et al.,  
615 2016). This microProtein duo also inhibits the oligomerization of PIF3 and EIN3 to repress  
616 their transcriptional activation potential (Wu et al., 2020). Here we report that miP1a/BBX31  
617 and miP1b/BBX30 physically interact with ABI5, stabilize it and promote its binding to the  
618 downstream targets to activate their expression (Figure 5,6,7). The versatility in the mode of  
619 action of the same miPs probably depending on the developmental stage of the plant and the  
620 environmental conditions is intriguing. During dark to light transition, miP1a/BBX31 and  
621 miP1b/BBX30 promote seedling de-etiolation, however, in the presence of ABA, these miPs  
622 arrest seedling development. What is the basis of this differential regulation in the presence  
623 or absence of stress is yet to be discovered. Our data shows that ABA induces the expression  
624 of *miP1a/BBX31* and *miP1b/BBX30* in a ABI5 dependent manner (Figure 8). ABI5 binds to  
625 the G-box motif present in the promoters of *miP1a/BBX31* and *miP1b/BBX30* to activate their  
626 expression (Figure 8). Previously HY5 has been shown to bind to the G-box of *BBX30* and  
627 *BBX31* to repress their transcription in light(Heng et al., 2019; Yadav et al., 2019). However  
628 this differential transcriptional regulation of the miPs is unlikely to account for their varied  
629 post-translational activity in presence or absence of ABA. The upregulation of *miP1a/BBX31*  
630 and *miP1b/BBX30* expression is extremely rapid and transient happening within the 1 hour of  
631 the transfer from dark to light (Wu et al., 2020). The inhibitory activity of miP1a/BBX31 and  
632 miP1b/BBX30 in preventing PIF3 and EIN3 functional oligomer formation also seems to be  
633 transient as PIF3 and EIN3 are eventually degraded by light. It is possible that the miPs might  
634 be disengaged from this transient activity in presence of stress. It would be interesting to see  
635 what happens to the allosteric deactivation of PIF3 and EIN3 by miP1a and miP1b in  
636 presence of ABA. The cooperative action of miP1a and miP1b in interacting with its targets  
637 is also a unique feature of this regulatory module that needs further characterization. In

638 several eukaryotes, miPs regulate transitions in the cell cycle and in the circadian clock. In  
639 yeast, the microProtein Nrs1 rewires the transcriptional machinery to regulate G1/S transition  
640 under nutrient stress conditions. This study and some previous reports indicate the role of  
641 miP1a/BBX31 and miP1b/BBX30 in modulating the transition from seed to seedling and  
642 vegetative to flowering state (Wu et al., 2020; Graeff et al., 2016). In the plant kingdom,  
643 miPs are generally present in dicotyledonous flowering plants and might have evolved to  
644 modulate these crucial transitions that regulate plant life and productivity (Graeff et al.,  
645 2016). The identification of light regulated microProteins in modulating ABA sensitivity  
646 during the early establishment phase, might open the doors for optogenetic manipulation of  
647 these versatile regulators. In the future, synthetic miPs may be used as molecular brakes to  
648 postpone development during unfavourable conditions to ensure plant survival.

649

## 650 **Materials and methods**

651

### 652 **Plant materials and growth conditions**

653 In this study, the accession of *Arabidopsis thaliana* used is Columbia-0 (Col-0). The mutant  
654 and overexpresser lines *bbx30*, *bbx31*, *BBX30OE*, *BBX31OE*, *abi5-8*, and *ABI5OE* have been  
655 described previously (Graeff et al., 2016; Yadav et al., 2019; Yadukrishnan et al., 2020;  
656 Nambara et al., 1995). The double and triple mutants used in this study were generated by  
657 genetic crossing. The growth conditions and ABA treatments were similar to those described  
658 previously (Yadukrishnan et al., 2020). In short, the seeds were surface sterilized with  
659 sodium hypochlorite and stratified in water for 3 days. The seed was then sown on 0.5x MS (-  
660 )sucrose plates containing 1% agar and transferred to 16 h/8 h light/dark cycles of 80  $\mu\text{mol}$   
661  $\text{m}^{-2} \text{sec}^{-1}$  of white light and 22°C in a Percival (CU-41L4) growth chamber for the desired  
662 number of days.

663

### 664 **Plasmid construction**

665 To generate His-BBX30 and His-BBX31 constructs, the full-length coding sequences of  
666 *BBX30* and *BBX31* were cloned into the *Bam*HI-*Eco*RI sites of the pET-28a vector and  
667 pGEX4T vector respectively. To generate GST-ABI5 construct the full-length *ABI5* was  
668 cloned in *Eco*RI-*Xho*I sites of the pGEX-4T-1. To generate YFP<sup>c</sup>-BBX30 and YFP<sup>c</sup>-BBX31  
669 construct, the coding sequence of *BBX30* and *BBX31* were amplified, and the cloned in  
670 pDONR207. The BP product was then cloned in destination vector pCL113. Similarly to  
671 generate YFP<sup>c</sup>-ABI5, full-length *ABI5* was cloned in pDONR207, and the BP product was  
672 cloned in pCL112. To create Yeast two-hybrid plasmid, the full-length coding region of  
673 *ABI5*, *BBX30* and *BBX31* were cloned in pGBKT7 (BD) and pGADT7 (AD) respectively. To  
674 study the domain interaction, we cloned different domains of *ABI5* in the AD vector and full-  
675 length *BBX31*, N-terminal, and C-terminal of *BBX31* in the BD vector. For the luciferase  
676 experiment, the reporter construct was generated by amplifying 1kb promoter of the *ABI5*  
677 gene followed by cloning at the *Kpn*I-*Pst*I sites of the pGreen II 0800-LUC vector (Lin et al.,  
678 2018). The effectors were generated by amplifying the coding sequence of the *BBX30*,  
679 *BBX31*, and *ABI5* gene, followed by its cloning in the pCAMBIA1300 vector using gateway

680 cloning. All primers used to create the above-mentioned constructs are listed in Supplemental  
681 Table S1. The constructs were confirmed via sequencing before use.

682

### 683 **Quantification of germination and seedling establishment**

684 Seeds of different genotypes were grown and harvested at the same time. The seeds were  
685 sterilized and stratified in water for 3 days. The seeds were then inoculated on 0.5x MS plates  
686 devoid of sucrose and supplemented with 0 $\mu$ M, 0.5 $\mu$ M, 1 $\mu$ M, 1.5 $\mu$ M of ABA. For estimating  
687 % germination, the seeds with completely emerged radicle were counted whereas for %  
688 seedling establishment seedlings with open green cotyledons were considered. All  
689 germination and seedling establishment experiments were performed thrice with >100 seeds  
690 per experiment. All the observations were made and representative images captured using  
691 Leica S6E stereomicroscope (Leica Microsystems, [www.leica-microsystems.com](http://www.leica-microsystems.com)).

692

### 693 **Yeast two-hybrid assays**

694 The protein interaction study was performed as described previously (Ravindran et al., 2021).  
695 Briefly, the respective combinations of BBX30, BBX31, and ABI5 were co-transformed into  
696 the yeast strain *AHI09*. Yeast transformants were then grown on the selection medium  
697 lacking leucine and tryptophan (DDO/-Trp-Leu). The interaction was further confirmed by  
698 growing on a medium lacking Trp, Leu, Ade, and His (QDO/-Trp-Leu-Ade-His).

699

### 700 ***In-Vitro* pull-down assay**

701 The His-BBX30, His-BBX31, and GST-ABI5 constructs were transformed into  
702 ArcticExpress (DE3) cells. For GST-ABI5, the secondary culture of ArcticExpress DE3  
703 transformed cells was induced by 0.5mM IPTG at 28° C for 4 hours. The lysate was  
704 incubated with GST beads (Glutathione Sepharose 4B, GE Healthcare) for 2 hours at 4° C. In  
705 the case of His-BBX30 and His-BBX31, the cell lysate was incubated with Ni-NTA beads  
706 (Ni Sepharose 6 Fast flow, GE Healthcare) for 45 mins. The GST and HIS protein-bound  
707 beads were washed with 1XPBS+300mM NaCl and 1XPBS+300mM NaCl+20mM imidazole  
708 respectively two times. GST-ABI5 was eluted using 30mM glutathione and His-tagged  
709 proteins were eluted using 250mM imidazole. The eluted proteins were concentrated, and  
710 excessive glutathione and imidazole were removed using MERCK concentrators. The  
711 purified 0.5 $\mu$ M GST-ABI5 and GST were allowed to bind to the GST beads for 2h at 4°C.  
712 The protein-bound beads were then incubated with purified His-BBX30 and His-BBX31 for  
713 2 hours at 4°C. The beads were then washed with PBS twice to remove the unbound protein.  
714 The protein bound to the beads were separated using 10% SDS gel, followed by blotting  
715 using Anti-His (SAB4301134, Sigma) and Anti-GST antibody (ab9085, abcam).

716

### 717 **Bi-molecular fluorescence complementation assay**

718 BiFC was performed as previously mentioned (Gampala et al., 2007). Briefly, the N-terminal  
719 and C-Terminal half of YFP vectors carrying full-length *ABI5*, *BBX30*, and *BBX31*  
720 respectively were transformed into *Agrobacterium* cells. The bacteria were grown overnight,  
721 briefly pelleted and resuspended in infiltration buffer (10mM MES, pH 5.7, 10mM MgCl<sub>2</sub>,  
722 150mM acetosyringone). The suspensions for the constructs as required for the

723 transformation were mixed and infiltrated into young, fully expanded leaves of *N.*  
724 *benthamiana*. The infiltrated leaves were imaged after 2 days using an FV-3000 Olympus  
725 confocal microscope with excitation of 488 nm and emission between 510-525 nm.

726

### 727 **Immunoblotting**

728 For Anti-ABI5 immunoblots, the germinated seeds of Col-0, *bbx30bbx31*, *BBX31OE*,  
729 *ABI5OE*, and *bbx30bbx31ABI5OE* were transferred to media containing 10  $\mu$ M ABA for  
730 indicated time intervals and the harvested samples were crushed in liquid nitrogen and  
731 homogenized in extraction buffer (50 mM Tris-HCl, pH 7.5, 75 mM NaCl, 10 mM EDTA,  
732 10 mM MgCl<sub>2</sub>, 0.1% Tween 20, 1mM NaF, and 1 X proteases inhibitor mix, Sigma)  
733 followed by centrifugation for 10 min at 11,000 g at 4 °C. Protein concentrations were  
734 determined by the Bradford method. 40 $\mu$ g of total protein were loaded per well in SDS-  
735 acrylamide/bisacrylamide gel and proteins were electrophoretically transferred to a PVDF  
736 membrane (Millipore). For treatment with MG132 and ABA, the germinated seeds of Col-0  
737 and *bbx30bbx31* were transferred to media containing 0.5x MS -sucrose with 10 $\mu$ M ABA or  
738 50 $\mu$ M MG132 for the indicated time. Samples were harvested and blotted using an anti-ABI5  
739 antibody. Actin was used as an internal loading sample control. For cycloheximide (CHX)  
740 treatment, germinated seeds were treated with 20 $\mu$ M ABA for 12 hours in the presence of  
741 100 $\mu$ M CHX and samples were harvested at different time intervals. H3 protein was used as a  
742 sample loading control. Proteins were detected using Anti-ABI5 and Anti-H3 antibody. For  
743 immunoblotting, the membrane was blocked for 1 hour in Tris-buffered saline-0.1% Tween  
744 20 (TBST) containing 5% BSA. After blocking the proteins were probed with antibodies  
745 diluted in TBST overnight at 4°C. The antibodies used were Anti-ABI5 (ab98831; Abcam,  
746 www.abcam.com), Anti-ACTIN (Sigma A0480), Anti-H3 (AS10 710, Agrisera). The  
747 membrane was then washed thrice with TBST followed by secondary antibody incubation for  
748 1 hour at room temperature. The secondary antibody used was goat-raised horseradish  
749 peroxidase-conjugated antirabbit IgG (Sigma) in 1:8000 dilution. To develop the membrane,  
750 ECL western blotting substrate (Pierce™), was used. The protein bands were visualized  
751 using the ChemiDoc MP imaging system (Bio-Rad). The band intensity was measured using  
752 ImageJ software.

### 753 **Electrophoretic mobility shift assay (EMSA)**

754 Full-length *BBX30* and *BBX31* cloned in pCold-TF vector was transformed into  
755 ArcticExpress DE3 cells. The secondary culture was induced with 0.2mM IPTG at 28° C for  
756 3 hours, and the cell lysate was incubated with Ni-NTA beads for 1 hour at 4°C. EMSA was  
757 performed as described previously (Job et al., 2018). Briefly, 30-50 base pair oligos were  
758 labeled using (Biotin 3' End DNA Labeling Kit; Pierce), followed by annealing of  
759 complementary strands. 1 $\mu$ g of mentioned proteins and 2 $\mu$ g in case of 2X, were incubated  
760 with 20 fmol biotinylated probes. The binding was checked by running the incubation  
761 mixture on 6% (v/v) native polyacrylamide gels in 0.5 $\times$  TBE. The DNA-protein complex was  
762 blotted to a positively charged nylon membrane and imaged using Chemiluminescent Nucleic  
763 Acid Detection Module (Thermo Fisher Scientific). The primers used are listed in  
764 Supplemental Table S1.

## 765 **Chromatin immunoprecipitation (ChIP)-qPCR**

766 The ChIP assay was performed as described previously (Saleh et al., 2008; Komar et al.,  
767 2016; Yadukrishnan et al., 2020). Briefly, approximately 1g of seeds were sterilized and  
768 grown on a 0.5xMS-suc plate containing 1 $\mu$ M ABA for 3 days. The harvested tissue was  
769 crosslinked by fixing in 1% formaldehyde along with vacuum infiltration. The crosslinking  
770 was stopped by adding 0.125M glycine to it. Next, chromatin was isolated using a series of  
771 extraction buffers as mentioned in (Saleh et al., 2008), followed by sonication using 4 cycles-  
772 30 sec on/30 sec off at 4°C. 10 percent of the total chromatin sample was stored as input, the  
773 rest chromatin sample was incubated with antibody-coated beads at 4°C. The bead-bound  
774 chromatin was then processed for reverse crosslinking using 5M NaCl and 65°C incubation  
775 for 4-6 hours. The beads were then removed from the solution using the magnetic rack, and  
776 the DNA was purified using a DNA fragment purification kit. The enrichment was checked  
777 through qPCR using primers specific to the promoter/protein binding region. The percentage  
778 input methods were used to analyze the enrichment. All the primers used are listed in  
779 Supplemental Table S1.

780

## 781 **Luciferase assay**

782 The protoplast isolation was done as described earlier (Sheen, 2002). pGreen II 0800-LUC  
783 vector was used to generate the *ABI5<sub>pro</sub>: LUC* reporter. *BBX30*, *BBX31*, and *ABI5* cloned  
784 under *35S* promoter were used as effectors. The vectors in different combinations were  
785 transfected into the protoplast via PEG solution and incubated overnight to ensure the  
786 expression of protein and the activation of the promoter. The luciferase activity was  
787 measured using the Promega kit (E1910) and *Renilla luciferase* activity was used as an  
788 internal control.

789

## 790 **RNA isolation and qPCR**

791 RNA was isolated from germinated seeds as previously mentioned (Yadukrishnan et al.,  
792 2020). cDNA was prepared using Bio-Rad iSCRIPT cDNA synthesis kit as instructed in the  
793 manufacturer's protocol. qPCR was performed in LightCycler®96 (Roche, www.roche.com)  
794 machine, and TB Green® Premix EX Taq™ II SYBR Green dye was used (TaKaRa,  
795 www.takarabio.com). For internal control, the reference genes used were UBIQUITIN10 and  
796 GAPDH. The qPCR primers used are listed in Supplemental Table S1. The values depicted in  
797 the graphs represent the three independent experiments.

798

## 799 **Statistical analysis**

800 All the statistical analyses were performed using Graph Pad Prism 9.0 and Microsoft Excel.  
801 To determine the statistical significance, one-way ANOVA was performed followed by  
802 Tukey's *post hoc* test. Other details of the analyses are mentioned in the figure legends.

803

## 804 **Accession numbers**

805 *BBX30* (AT4G15248), *BBX31* (AT3G21890), *ABI5* (AT2G36270), *EMI* (AT3G51810),  
806 *EM6* (AT2G40170).

807



## 808 Acknowledgements

809 DS acknowledges IISER Bhopal for PhD fellowship. SD acknowledges the SERB grant  
810 STR/2021/000046 for funding. Authors acknowledge Dr. Stephan Wenkel and Dr. Arpita  
811 Yadav for providing *miP1b/BBX30* and *miP1a/BBX31* mutant and overexpresser lines used in  
812 previous studies. Authors also acknowledge Dr. Nevedha Ravindran, Rahul Puthan Valappil  
813 and Dr. Yadukrishnan Prem for sharing *ABI5* constructs and *ABI5OE* lines. Authors  
814 acknowledge the assistance provided by Rucha Kulkarni and Akshat Singh Raghuvanshi for  
815 some experiments. Authors thank Henrik Johansson and Yadukrishnan Prem for critical  
816 comments. Authors thanks all current PCDB lab members especially Dr. Amit Kushwaha,  
817 Arpan Mukherjee, Shubhi Dwivedi, Debojyoti Kar, Rahul Puthan Valappil and Ajar Anupam  
818 Pradhan for critical reading of the manuscript and providing valuable comments.

819

## 820 References

821

- 822 **Albertos, P., Romero-Puertas, M.C., Tatematsu, K., Mateos, I., Sánchez-Vicente, I.,**  
823 **Nambara, E., and Lorenzo, O.** (2015). S-nitrosylation triggers ABI5 degradation to  
824 promote seed germination and seedling growth. *Nature Communications* **6**: 1–10.
- 825 **Ali, A., Pardo, J.M., and Yun, D.J.** (2020). Desensitization of ABA-Signaling: The Swing From  
826 Activation to Degradation. *Frontiers in Plant Science* **11**.
- 827 **Komar, D.N., Mouriz, A., Jarillo, J.A., and Piñeiro, M.** (2016). Chromatin  
828 Immunoprecipitation Assay for the Identification of Arabidopsis Protein-DNA  
829 Interactions In Vivo. *JoVE* (**107**): e53422.
- 830 **Bai, M., Sun, J., Liu, J., Ren, H., Wang, K., Wang, Y., Wang, C., and Dehesh, K.** (2019). The B-  
831 box protein BBX19 suppresses seed germination via induction of ABI5. *Plant Journal* **99**:  
832 1192–1202.
- 833 **Bursch, K., Toledo-Ortiz, G., Pireyre, M., Lohr, M., Braatz, C., and Johansson, H.** (2020).  
834 Identification of BBX proteins as rate-limiting cofactors of HY5. *Nature Plants* **6**: 921–  
835 928.
- 836 **Cao, J., Liang, Y., Yan, T., Wang, X., Zhou, H., Chen, C., Lin, F. et al.** (2022). The  
837 photomorphogenic repressors BBX28 and BBX29 integrate light and brassinosteroid  
838 signaling to inhibit seedling development in Arabidopsis. *Plant Cell* **34**(6): 2266–2285.
- 839 **Carles, C., Bies-Etheve, N., Aspart, L., Léon-Kloosterziel, K.M., Koornneef, M., Echeverria,**  
840 **M., and Delseny, M.** (2002). Regulation of Arabidopsis thaliana Em genes: role of ABI5.  
841 *The Plant Journal* **30**: 373–383.
- 842 **Chattopadhyay, S., Ang, L., Puente, P., Deng, X., and Wei, N.** (1998). Arabidopsis bZIP  
843 Protein HY5 Directly Interacts with Light-Responsive Promoters in Mediating Light  
844 Control of Gene Expression. **10**: 673–683.
- 845 **Chen, H., Zhang, J., Neff, M.M., Hong, S.W., Zhang, H., Deng, X.W., and Xiong, L.** (2008).  
846 Integration of light and abscisic acid signaling during seed germination and early  
847 seedling development. *Proc Natl Acad Sci U S A* **105**: 4495–4500.
- 848 **Choi, H.I., Hong, J.H., Ha, J.O., Kang, J.Y., and Kim, S.Y.** (2000). ABFs, a family of ABA-  
849 responsive element binding factors. *Journal of Biological Chemistry* **275**: 1723–1730.
- 850 **Collin, A., Daszkowska-Golec, A., and Szarejko, I.** (2021). Updates on the role of ABSCISIC  
851 ACID INSENSITIVE 5 (ABI5) and ABSCISIC ACID-RESPONSIVE ELEMENT BINDING  
852 FACTORS (ABFs) in ABA signaling in different developmental stages in plants. *Cells* **10**.

- 853 **Datta, S., Hettiarachchi, C., Johansson, H., and Holm, M.** (2007). SALT TOLERANCE  
854 HOMOLOG2 , a B-Box Protein in Arabidopsis That Activates Transcription and Positively  
855 Regulates Light-Mediated Development. **19**: 3242–3255.
- 856 **Deng, X.W., Caspar, T., and Quail, P.H.** (1991). cop1: A regulatory locus involved in light-  
857 controlled development and gene expression in Arabidopsis. *Genes and Development*  
858 **5**: 1172–1182.
- 859 **Dolde, U., Rodrigues, V., Straub, D., Bhati, K.K., Choi, S., Yang, S.W., and Wenkel, S.** (2018).  
860 Synthetic MicroProteins: Versatile Tools for Posttranslational Regulation of Target  
861 Proteins. *Plant Physiology* **176**: 3136–3145.
- 862 **Dong, J., Tang, D., Gao, Z., Yu, R., Li, K., He, H., Terzaghi, W., Deng, X.W., and Chen, H.**  
863 (2014). Arabidopsis DE-ETIOLATED1 represses photomorphogenesis by positively  
864 regulating phytochrome-interacting factors in the dark. *Plant Cell* **26**: 3630–3645.
- 865 **Finkelstein, R.R. and Lynch, T.J.** (2000). The Arabidopsis abscisic acid response gene ABI5  
866 encodes a basic leucine zipper transcription factor. *Plant Cell* **12**: 599–609.
- 867 **Gampala, S.S. et al.** (2007). An Essential Role for 14-3-3 Proteins in Brassinosteroid Signal  
868 Transduction in Arabidopsis. *Developmental Cell* **13**: 177–189.
- 869 **Gangappa, S.N. and Botto, J.F.** (2014). The BBX family of plant transcription factors. *Trends*  
870 *in Plant Science* **19**: 460–470.
- 871 **Gangappa, S.N., Crocco, C.D., Johansson, H., Datta, S., Hettiarachchi, C., Holm, M., and**  
872 **Botto, J.F.** (2013a). The Arabidopsis B-BOX protein BBX25 interacts with HY5,  
873 negatively regulating BBX22 expression to suppress seedling photomorphogenesis.  
874 *Plant Cell* **25**: 1243–57.
- 875 **Gangappa, S.N., Holm, M., and Botto, J.F.** (2013b). Molecular interactions of BBX24 and  
876 BBX25 with HYH, HY5 HOMOLOG, to modulate Arabidopsis seedling development.  
877 *Plant Signal Behav* **8**: 37–41.
- 878 **Graeff, M., Straub, D., Eguen, T., Dolde, U., Rodrigues, V., Brandt, R., and Wenkel, S.**  
879 (2016). MicroProtein-Mediated Recruitment of CONSTANS into a TOPLESS Trimeric  
880 Complex Represses Flowering in Arabidopsis. *PLoS Genetics* **12**: 1–22.
- 881 **Heng, Y., Lin, F., Jiang, Y., Ding, M., Yan, T., Lan, H., Zhou, H., Zhao, X., Xu, D., and Deng,**  
882 **X.W.** (2019). B-box containing proteins bbx30 and bbx31, acting downstream of hy5,  
883 negatively regulate photomorphogenesis in arabidopsis. *Plant Physiology* **180**: 497–  
884 508.
- 885 **Holtan, H.E. et al.** (2011). BBX32, an Arabidopsis B-Box Protein, Functions in Light Signaling  
886 by Suppressing HY5-Regulated Gene Expression and Interacting with STH2/BBX21.  
887 *PLANT PHYSIOLOGY* **156**: 2109–2123.
- 888 **Hong, S.-Y., Sun, B., Straub, D., Blaakmeer, A., Mineri, L., Koch, J., Brinch-Pedersen, H.,**  
889 **Holme, I.B., Burow, M., Jørgen Lyngs Jørgensen, H., Mar Albà, M., and Wenkel, S.**  
890 (2005). Heterologous microProtein expression identifies LITTLE NINJA, a dominant  
891 regulator of jasmonic acid signaling. *PNAS* **117**: 26197–26205.
- 892 **Jiang, K., Sorefan, K., Deeks, M.J., Bevan, M.W., Hussey, P.J., and Hetherington, A.M.**  
893 (2012). The ARP2/3 complex mediates guard cell actin reorganization and stomatal  
894 movement in Arabidopsis. *Plant Cell* **24**: 2031–2040.
- 895 **Job, N.** (2020). PIF3 / HY5 module regulates BBX11 to suppress protochlorophyll- lide levels  
896 in dark and promote photomorphogenesis in light. **1**.
- 897 **Job, N., Yadukrishnan, P., Bursch, K., Datta, S., and Johansson, H.** (2018). Two B-box  
898 proteins regulate photomorphogenesis by oppositely modulating HY5 through their  
899 diverse C-terminal domains. *Plant Physiology* **176**: 2963–2976.

- 900 **Kang, X., Xu, G., Lee, B., Chen, C., Zhang, H., Kuang, R., and Ni, M.** (2018). HRB2 and BBX21  
901 interaction modulates Arabidopsis ABI5 locus and stomatal aperture. *Plant Cell and*  
902 *Environment* **41**: 1912–1925.
- 903 **Kim, J., Kang, H., Park, J., Kim, W., Yoo, J., Lee, N., Kim, J., Yoon, T.-Y., and Choi, G.** (2016).  
904 PIF1-Interacting Transcription Factors and Their Binding Sequence Elements Determine  
905 the in Vivo Targeting Sites of PIF1. *Plant Cell* **28**: 1388–1405.
- 906 **Kruusvee, V., Toft, A.M., Aguida, B., Ahmad, M., and Wenkel, S.** (2022). Stop CRYing!  
907 Inhibition of cryptochrome function by small proteins. *Biochemical Society*  
908 *Transactions* **50**: 773–782.
- 909 **Kruusvee, V. and Wenkel, S.** (2022). Microproteins — lost in translation. *Nature Chemical*  
910 *Biology* **18(6)**: 581-582
- 911 **Lau, O.S. and Deng, X.W.** Plant hormone signaling lightens up : integrators of light and  
912 hormones. *Current Opinion in Plant Biology* **13**: 571–577.
- 913 **Lee, J.-H., Yoon, H.-J., Terzaghi, W., Martinez, C., Dai, M., Li, J., Byun, M.-O., and Deng,**  
914 **X.W.** (2010). DWA1 and DWA2, two Arabidopsis DWD protein components of CUL4-  
915 based E3 ligases, act together as negative regulators in ABA signal transduction. *Plant*  
916 *Cell* **22**: 1716–1732.
- 917 **Leung, J. and Giraudat, J.** (1998). Abscisic Acid Signal Transduction. *Annual Review of Plant*  
918 *Physiology and Plant Molecular Biology* **49**: 199–222.
- 919 **Lin, F., Jiang, Y., Li, J., Yan, T., Fan, L., Liang, J., Chen, Z.J., Xu, D., and Deng, X.W.** (2018). B-  
920 BOX DOMAIN PROTEIN28 negatively regulates photomorphogenesis by repressing the  
921 activity of transcription factor hy5 and undergoes COP1-mediated degradation. *Plant*  
922 *Cell* **30**: 2006–2019.
- 923 **Lopez-Molina, L., Mongrand, S., and Chua, N.H.** (2001). A postgermination developmental  
924 arrest checkpoint is mediated by abscisic acid and requires the ABI5 transcription  
925 factor in Arabidopsis. *Proc Natl Acad Sci U S A* **98**: 4782–4787.
- 926 **Lopez-Molina, L., Mongrand, S., Kinoshita, N., and Chua, N.H.** (2003). AFP is a novel  
927 negative regulator of ABA signaling that promotes ABI5 protein degradation. *Genes and*  
928 *Development* **17**: 410–418.
- 929 **Magnani, E., de Klein, N., Nam, H.I., Kim, J.G., Pham, K., Fiume, E., Mudgett, M.B., and**  
930 **Rhee, S.Y.** (2014). A comprehensive analysis of microproteins reveals their potentially  
931 widespread mechanism of transcriptional regulation. *Plant Physiology* **165**: 149–159.
- 932 **Maia, J., Dekkers, B.J.W., Dolle, M.J., Ligterink, W., and Hilhorst, H.W.M.** (2014). Abscisic  
933 acid (ABA) sensitivity regulates desiccation tolerance in germinated Arabidopsis seeds.  
934 *New Phytologist* **203**: 81–93.
- 935 **Min, J.H., Chung, J.S., Lee, K.H., and Kim, C.S.** (2015). The CONSTANS-like 4 transcription  
936 factor, AtCOL4, positively regulates abiotic stress tolerance through an abscisic acid-  
937 dependent manner in Arabidopsis. *Journal of Integrative Plant Biology* **57**: 313–324.
- 938 **Miura, K. and Hasegawa, P.M.** (2009). Sumoylation and abscisic acid signaling. *Plant Signal*  
939 *Behav* **4**: 1176–1178.
- 940 **Nakashima, K., Fujita, Y., Kanamori, N., Katagiri, T., Umezawa, T., Kidokoro, S., Maruyama,**  
941 **K., Yoshida, T., Ishiyama, K., Kobayashi, M., Shinozaki, K., and Yamaguchi-Shinozaki,**  
942 **K.** (2009). Three Arabidopsis SnRK2 Protein Kinases, SRK2D/SnRK2.2,  
943 SRK2E/SnRK2.6/OST1 and SRK2I/SnRK2.3, Involved in ABA Signaling are Essential for  
944 the Control of Seed Development and Dormancy. *Plant and Cell Physiology* **50**: 1345–  
945 1363.

- 946 **Nambara, E., Keith, K., McCourt, P., and Naito, S.** (1995). A regulatory role for the ABI3  
947 gene in the establishment of embryo maturation in *Arabidopsis thaliana*. *Development*  
948 **121**: 629–636.
- 949 **Neff, M.M. and Volkenburgh, E. van** (1994). Light-Stimulated Cotyledon Expansion in the.:  
950 1433–1436.
- 951 **Ng, L.M., Melcher, K., Teh, B.T., and Xu, H.E.** (2014). Abscisic acid perception and signaling:  
952 structural mechanisms and applications. *Acta Pharmacologica Sinica* **35**: 567–584.
- 953 **Penfield, S., Josse, E.M., and Halliday, K.J.** (2010). A role for an alternative splice variant of  
954 PIF6 in the control of *Arabidopsis* primary seed dormancy. *Plant Molecular Biology* **73**:  
955 89–95.
- 956 **Peng, J., Wang, M., Wang, X., Qi, L., Guo, C., Hong Li, Cong Li et al. (2022).** COP1 positively  
957 regulates ABA signaling during *Arabidopsis* seedling growth in darkness by mediating  
958 ABA-induced ABI5 accumulation. *Plant Cell* **34(6)**: 2286-2308.
- 959 **Qi, Lijuan, Shan Liu, Cong Li, Jingying Fu, Yanjun Jing, Jinkui Cheng, Hong Li et al. (2020)**  
960 PHYTOCHROME-INTERACTING FACTORS interact with the ABA receptors PYL8 and  
961 PYL9 to orchestrate ABA signaling in darkness. *Molecular Plant*, **13(3)**: 414-430.
- 962 **Ravindran, N., Ramachandran, H., Job, N., Yadav, A., Vaishak, K.P., and Datta, S.** (2021). B-  
963 box protein BBX32 integrates light and brassinosteroid signals to inhibit cotyledon  
964 opening. *Plant Physiology*: 1–16.
- 965 **Rodrigues, V.L., Dolde, U., Sun, B., Blaakmeer, A., Straub, D., Eguen, T., Botterweg-  
966 Paredes, E., Hong, S., Graeff, M., Li, M.W., Gendron, J.M., and Wenkel, S.** (2021). A  
967 microProtein repressor complex in the shoot meristem controls the transition to  
968 flowering. *Plant Physiology* **187**: 187–202.
- 969 **Sakuraba, Y., Jeong, J., Kang, M., Kim, J., Paek, N., and Choi, G.** (2014). and PIF5 induce leaf  
970 senescence in *Arabidopsis*.
- 971 **Saleh, A., Alvarez-Venegas, R., and Avramova, Z.** (2008). An efficient chromatin  
972 immunoprecipitation (ChIP) protocol for studying histone modifications in *Arabidopsis*  
973 plants. *Nature Protocols* **3**: 1018–1025.
- 974 **Sheen, J.** (2002). A Transient Expression Assay Using *Arabidopsis* Mesophyll Protoplasts A .  
975 Protoplast Isolation. *Plant Cell*: 1–6.
- 976 **Shi, H., Zhong, S., Mo, X., Liu, N., Nezames, C.D., and Deng, X.W.** (2013). HFR1 sequesters  
977 PIF1 to govern the transcriptional network underlying light-initiated seed germination  
978 in *Arabidopsis*. *Plant Cell* **25**: 3770–3784.
- 979 **Shu, K., Luo, X., Meng, Y., and Yang, W.** (2018). Toward a Molecular Understanding of  
980 Abscisic Acid Actions in Floral Transition. *Plant and Cell Physiology* **59**: 215–221.
- 981 **Song, Z., Bian, Y., Liu, J., Sun, Y., and Xu, D.** (2020a). B-box proteins: Pivotal players in light-  
982 mediated development in plants. *Journal of Integrative Plant Biology* **62**: 1293–1309.
- 983 **Song, Z., Yan, T., Liu, J., Bian, Y., Heng, Y., Lin, F., Jiang, Y., and Deng, X.W.** (2020). BBX28 /  
984 BBX29 , HY5 and BBX30 / 31 form a feedback loop to fine-tune photomorphogenic  
985 development. **1**: 377–390.
- 986 **Staudt, A.C. and Wenkel, S.** (2011). Regulation of protein function by “microProteins.”  
987 *EMBO Reports* **12**: 35–42.
- 988 **Stone, S.L., Williams, L.A., Farmer, L.M., Vierstra, R.D., and Callis, J.** (2006). KEEP ON  
989 GOING, a RING E3 ligase essential for *Arabidopsis* growth and development, is involved  
990 in abscisic acid signaling. *Plant Cell* **18**: 3415–3428.

- 991 **Tang, W., Ji, Q., Huang, Y., Jiang, Z., Bao, M., Wang, H., and Lin, R.** (2013). FAR-RED  
992 ELONGATED HYPOCOTY13 and FAR-RED IMPAIRED RESPONSE1 transcription factors  
993 integrate light and abscisic acid signaling in Arabidopsis. *Plant Physiology* **163**: 857–866.
- 994 **Tezuka, K., Taji, T., Hayashi, T., and Sakata, Y.** (2013). A novel *abi5* allele reveals the  
995 importance of the conserved Ala in the C3 domain for regulation of downstream genes  
996 and salt tolerance during germination in Arabidopsis. *Plant Signaling & Behavior* **8**:  
997 e23455.
- 998 **Tollis, S., Singh, J., Palou, R., Thattikota, Y., Ghazal, G., Coulombe-Huntington, J., Tang, X.,  
999 Moore, S., Blake, D., Bonneil, E., Royer, CA., Thibault, P., Tyers, M.** (2022). The  
1000 microprotein Nrs1 rewires the G1/S transcriptional machinery during nitrogen  
1001 limitation in budding yeast. *PLoS Biology* **20** (3): e3001548.
- 1002 **Tuteja, N.** (2007). Abscisic Acid and Abiotic Stress Signaling. *Plant Signaling & Behavior* **2**:  
1003 135–138.
- 1004 **Vaishak, K.P., Yadukrishnan, P., Bakshi, S., Kushwaha, A.K., Ramachandran, H., Job, N.,  
1005 Babu, D., and Datta, S.** (2019). The B-box bridge between light and hormones in plants.  
1006 *Journal of Photochemistry and Photobiology B: Biology* **191**: 164–174.
- 1007 **Weitbrecht, K., Müller, K., and Leubner-Metzger, G.** (2011). First off the mark: Early seed  
1008 germination. *Journal of Experimental Botany* **62**: 3289–3309.
- 1009 **Wu, Q., Kuang, K., Lyu, M., Zhao, Y., Li, Y., Li, J., Pan, Y., Shi, H., and Zhong, S.** (2020).  
1010 Allosteric deactivation of PIFs and EIN3 by microproteins in light control of plant  
1011 development. *Proc Natl Acad Sci U S A* **117**: 18858–18868.
- 1012 **Xiong, L., Schumaker, K.S., and Zhu, J.-K.** (2002). Cell Signaling during Cold, Drought, and  
1013 Salt Stress. *The Plant Cell* **14**: S165–S183.
- 1014 **Xu, D., Li, J., Gangappa, S.N., Hettiarachchi, C., Lin, F., Andersson, M.X., Jiang, Y., Deng,  
1015 X.W., and Holm, M.** (2014). Convergence of Light and ABA Signaling on the ABI5  
1016 Promoter. *PLOS Genetics* **10**: e1004197.
- 1017 **Xu, X., Wan, W., Jiang, G., Xi, Y., Huang, H., Cai, J., Chang, Y., Duan, C.G., Mangrauthia,  
1018 S.K., Peng, X., Zhu, J.K., and Zhu, G.** (2019). Nucleocytoplasmic Trafficking of the  
1019 Arabidopsis WD40 Repeat Protein XIW1 Regulates ABI5 Stability and Abscisic Acid  
1020 Responses. *Molecular Plant* **12**: 1598–1611.
- 1021 **Yadav, A., Bakshi, S., Yadukrishnan, P., Lingwan, M., Dolde, U., Wenkel, S., Masakapalli,  
1022 S.K., and Datta, S.** (2019a). The B-Box-containing microprotein miP1a/BBX31 regulates  
1023 photomorphogenesis and UV-B protection. *Plant Physiol* **179**: 1876–1892.
- 1024 **Yadav, A., Bakshi, S., Yadukrishnan, P., Lingwan, M., Dolde, U., Wenkel, S., Masakapalli,  
1025 S.K., and Datta, S.** (2019b). The B-box-containing microprotein miP1a/BBX31 regulates  
1026 photomorphogenesis and UV-B protection. *Plant Physiology* **179**: 1876–1892.
- 1027 **Yadav, A., Ravindran, N., Singh, D., Rahul, P.V., and Datta, S.** (2020a). Role of Arabidopsis  
1028 BBX proteins in light signaling. *Journal of Plant Biochemistry and Biotechnology* **29**:  
1029 623–635.
- 1030 **Yadav, A., Singh, D., Lingwan, M., Yadukrishnan, P., Masakapalli, S.K., and Datta, S.** (2020).  
1031 Light signaling and UV-B mediated plant growth regulation. *Journal of Integrative Plant  
1032 Biology*.
- 1033 **Yadukrishnan, P. and Datta, S.** (2021). Light and abscisic acid interplay in early seedling  
1034 development. *New Phytologist* **229**: 763–769.
- 1035 **Yadukrishnan, P., Job, N., Johansson, H., Datta, S., Job, N., and Johansson, H.** (2018).  
1036 Opposite roles of group IV BBX proteins : Exploring missing links between structural  
1037 and functional diversity. *Plant Signaling & Behavior* **13**(8): 1–3.

- 1038 **Yadukrishnan, P., Rahul, P.V., and Datta, S.** (2020a). HY5 Suppresses, Rather Than  
1039 Promotes, Abscisic Acid-Mediated Inhibition of Postgermination Seedling  
1040 Development. *Plant Physiology* **184**: 574–578.
- 1041 **Yadukrishnan, P., Rahul, P.V., Ravindran, N., Bursch, K., Johansson, H., and Datta, S.**  
1042 (2020). CONSTITUTIVELY PHOTOMORPHOGENIC1 promotes ABA-mediated inhibition of  
1043 post-germination seedling establishment. *Plant Journal* **103**: 481–496.  
1044

1 **SUPPLEMENTAL DATA**

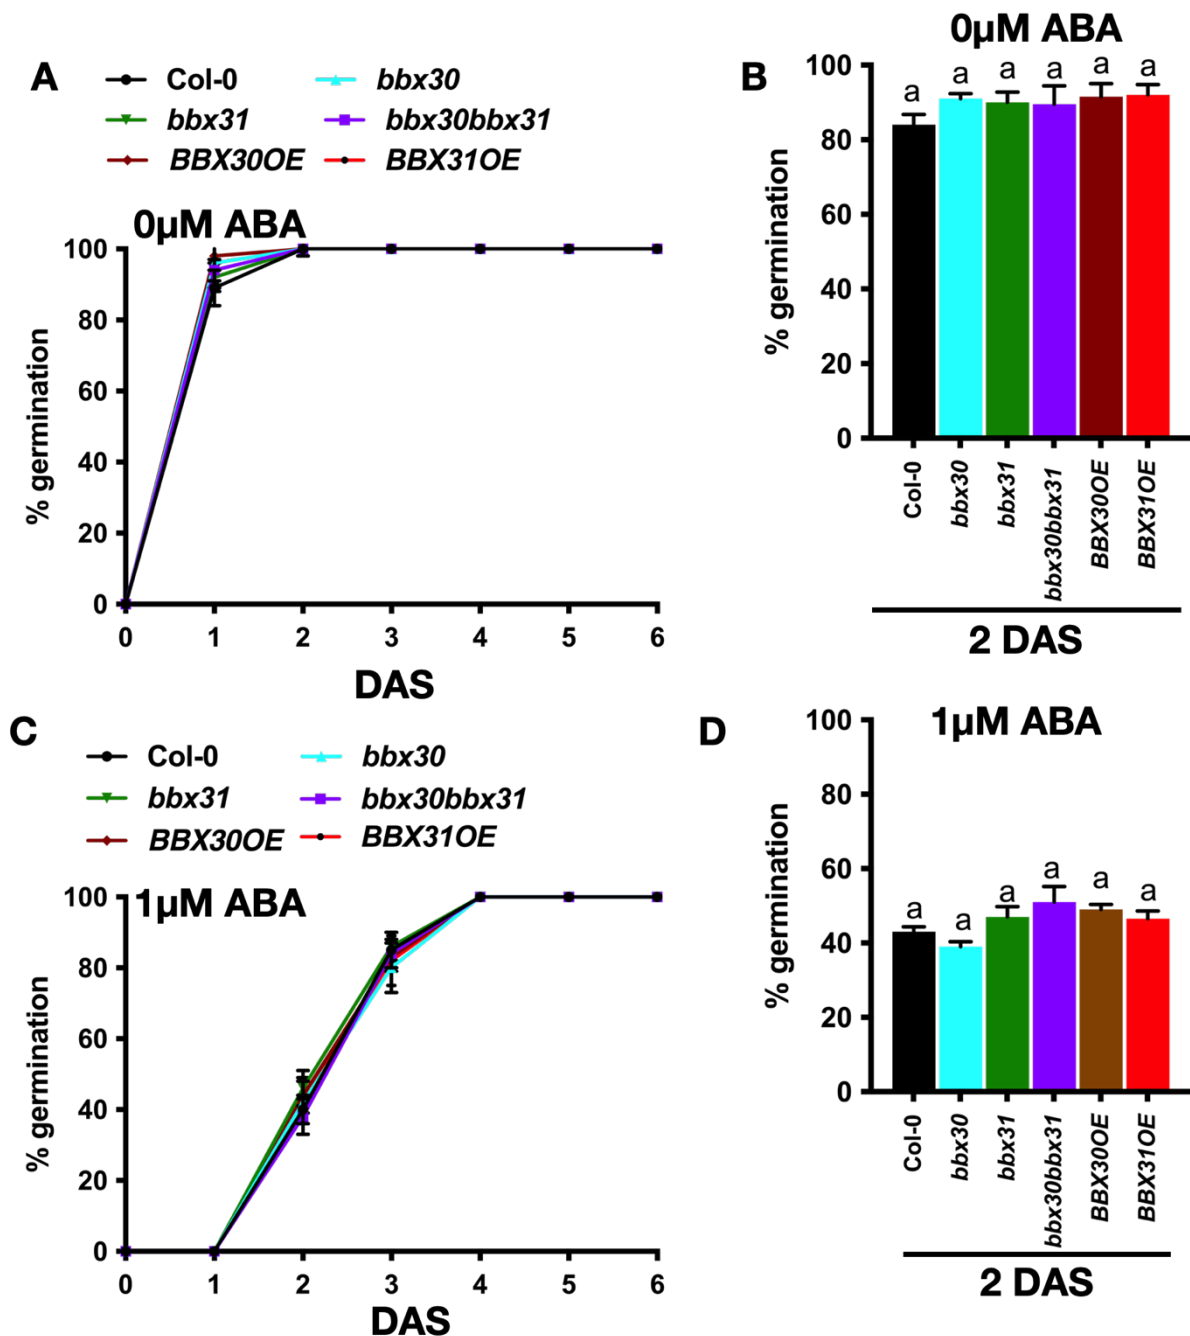

2  
3  
4  
5  
6  
7  
8  
9  
10

Supplemental Figure S1. % germination in Col-0, *bbx30*, *bbx31*, *bbx30 bbx31*, *BBX30OE* and *BBX31OE*, in -ABA and +ABA conditions

A-D, Graphical representation showing the similar % germination in the indicated genotypes under (A, B) 0µM and (C, D) 1µM ABA conditions. DAS indicates days after stratification. In (B, D) error bar represents SEM of three independent experiments with >100 seeds per experiment. Letters above the bar indicate the statistical groups as determined by one-way ANOVA followed by Tukey's *post hoc* test ( $p < 0.05$ ).

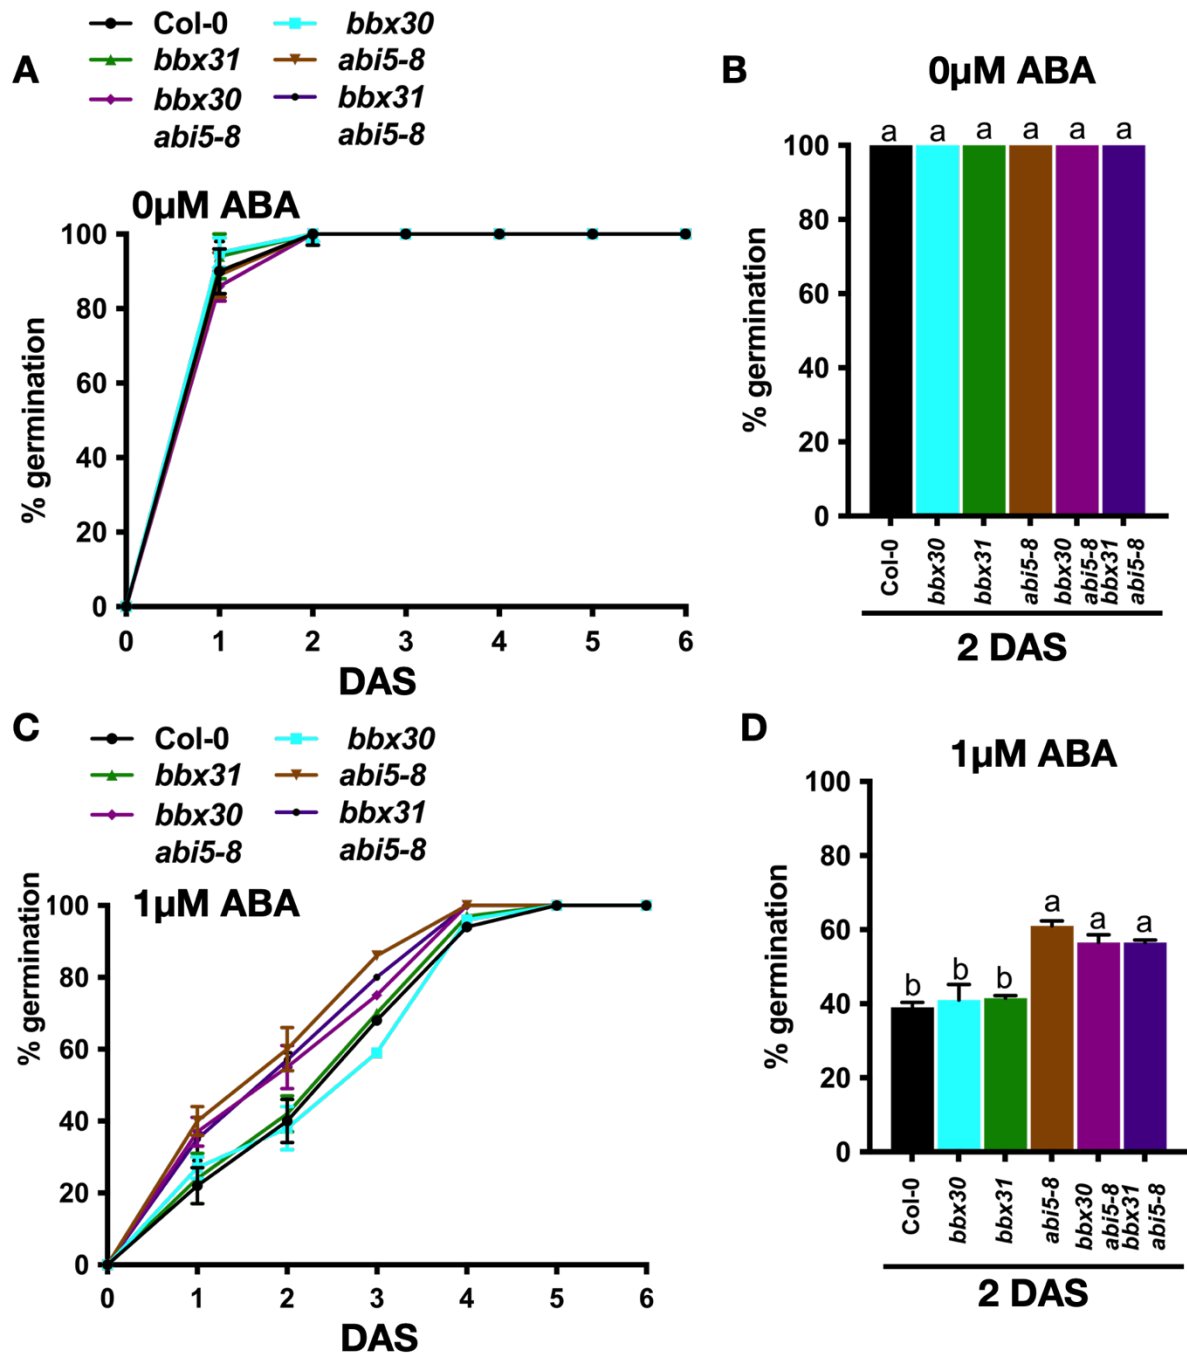

11

12

13 **Supplemental Figure S2. % germination in Col-0, *bbx30*, *bbx31*, *abi5-8*, *bbx30 abi5-8*,**  
 14 ***bbx31 abi5-8*.**

15 A-D, Graphical representation showing the % germination in the indicated genotypes under  
 16 (A, B) 0µM and (C, D) 1µM ABA conditions. DAS indicates days after stratification. In (B,  
 17 D) error bar represents SEM of three independent experiments with >100 seeds per experiment.  
 18 Letters above the bar indicate the statistical groups as determined by one-way ANOVA  
 19 followed by Tukey's *post hoc* test ( $p < 0.05$ ).

20



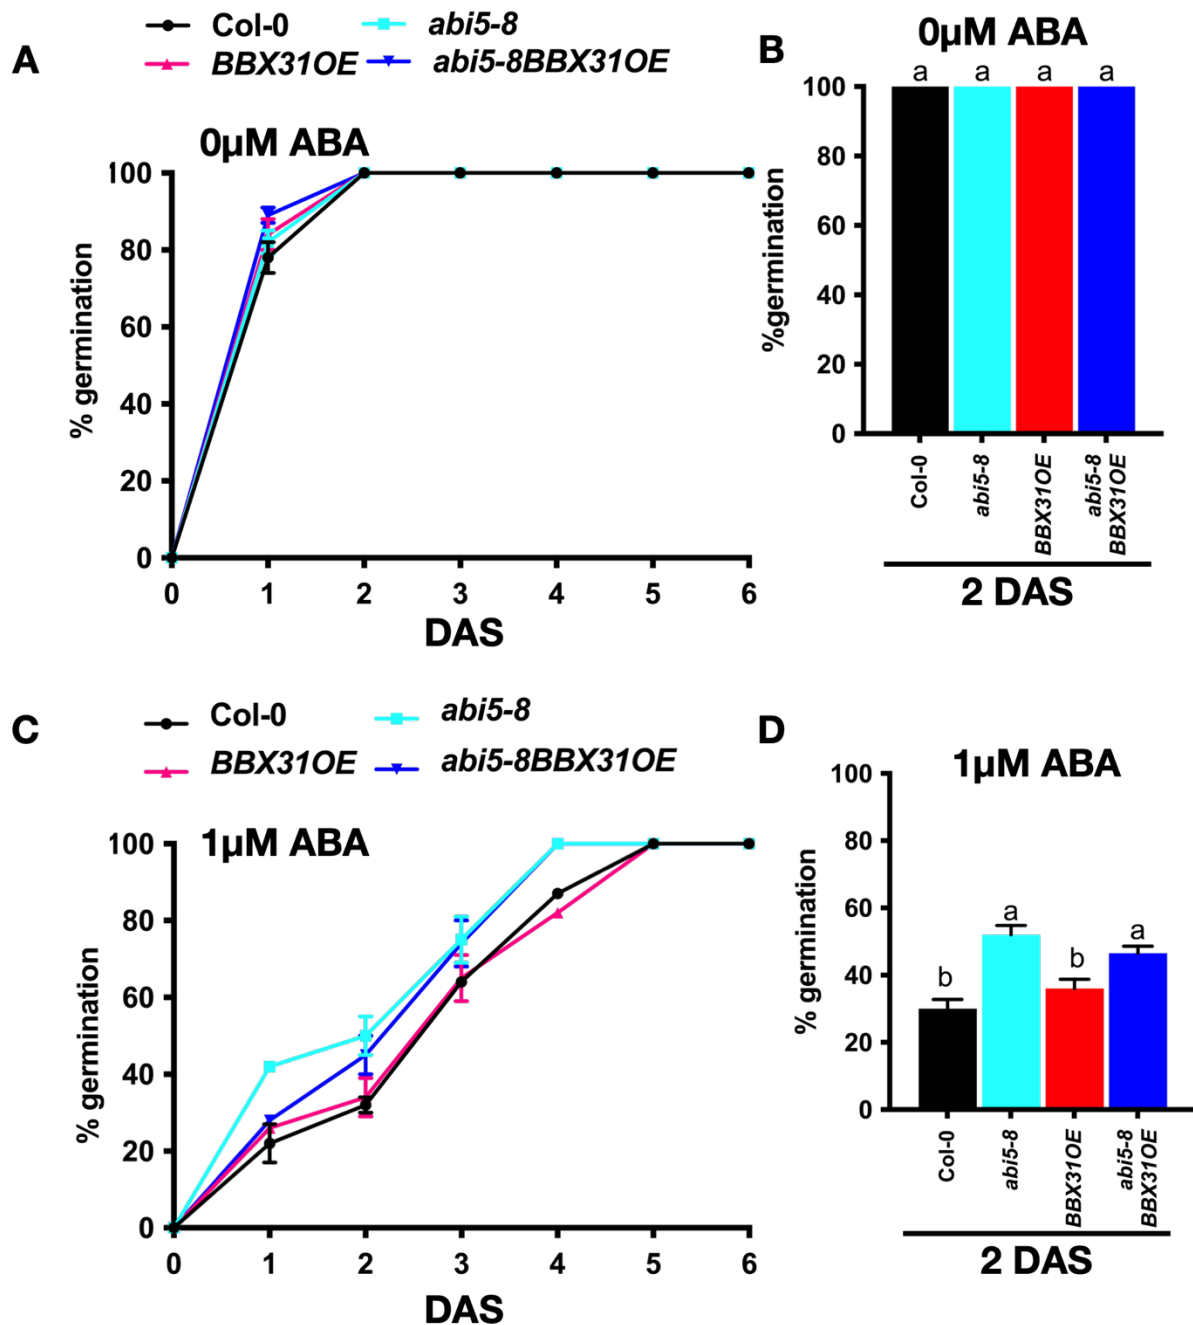

21

22

23 **Supplemental Figure S3. % germination of Col-0, *abi5-8*, *BBX31OE*, *abi5-8 BBX31OE***  
24 **in +/- ABA conditions**

25 A-D, Graphical representation showing the % germination in the indicated genotypes under  
26 (A, B) 0µM and (C, D) 1µM ABA conditions. DAS indicates days after stratification. In (B,  
27 D) error bar represents SEM of three independent experiments with >100 seeds per experiment.  
28 Letters above the bar indicate the statistical groups as determined by one-way ANOVA  
29 followed by Tukey's *post hoc* test ( $p < 0.05$ ).

30

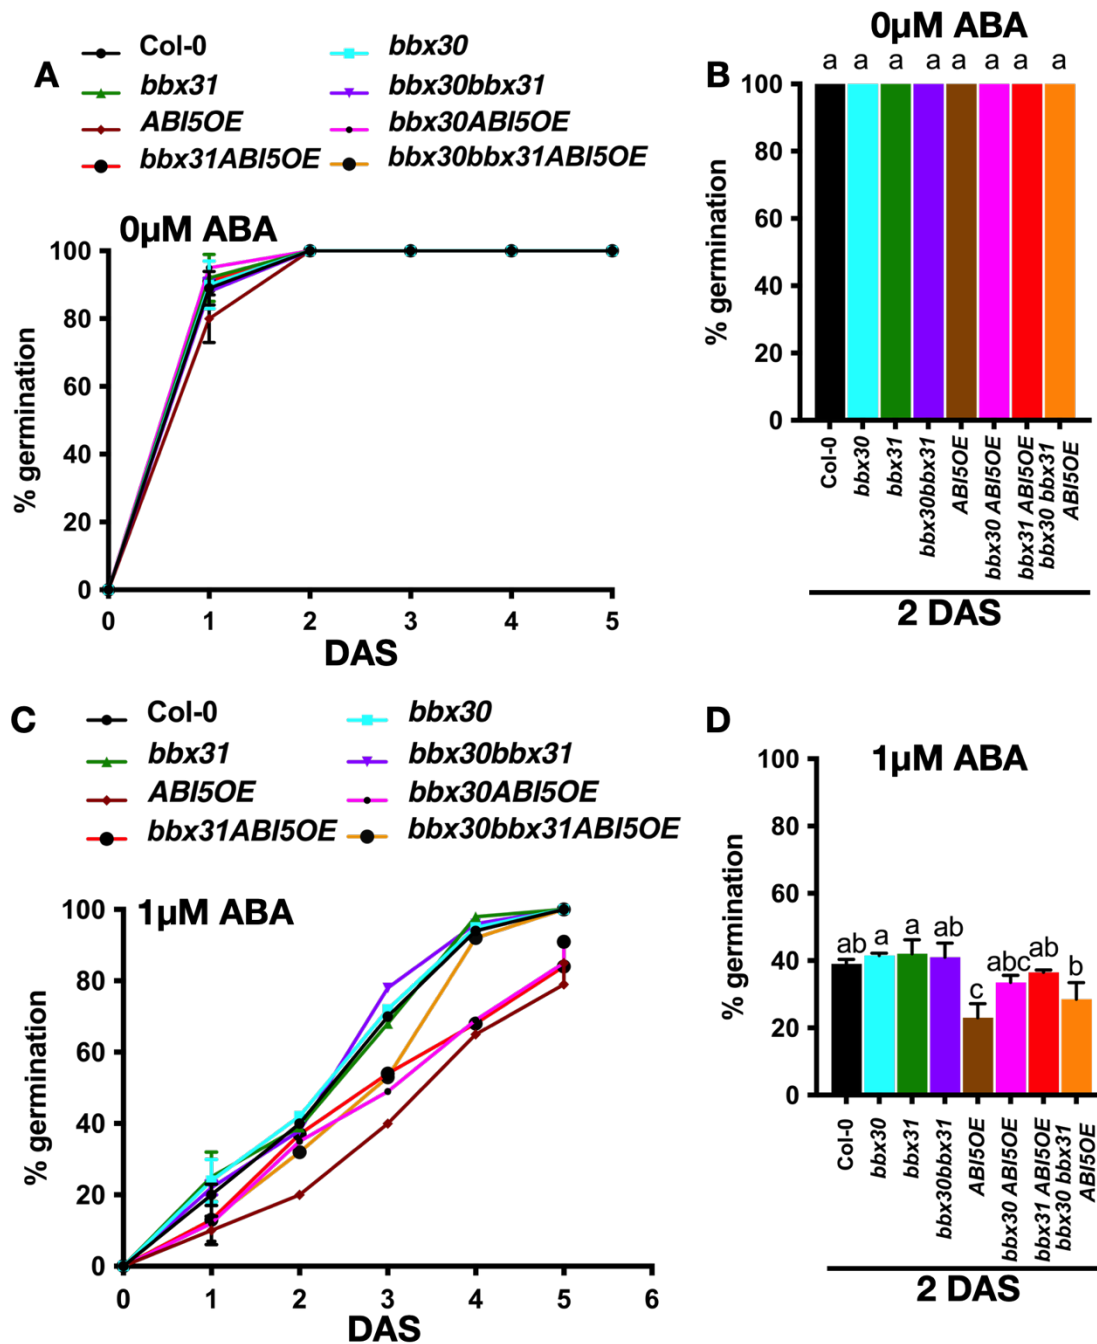

31 Supplemental Figure S4. % germination of Col-0, *bbx30*, *bbx31*, *bbx30bbx31*, *ABI5OE*,  
32 *bbx30 ABI5OE*, *bbx31 ABI5OE*, *bbx30bbx31 ABI5OE* in +/- ABA conditions

33 A-D, Graphical representation showing the % germination in the indicated genotypes under  
34 (A, B) 0µM and (C, D) 1µM ABA conditions. DAS indicates days after stratification. In (B,  
35 D) error bar represents SEM of three independent experiments with >100 seeds per experiment.  
36 Letters above the bar indicate the statistical groups as determined by one-way ANOVA  
37 followed by Tukey's *post hoc* test ( $p < 0.05$ ).

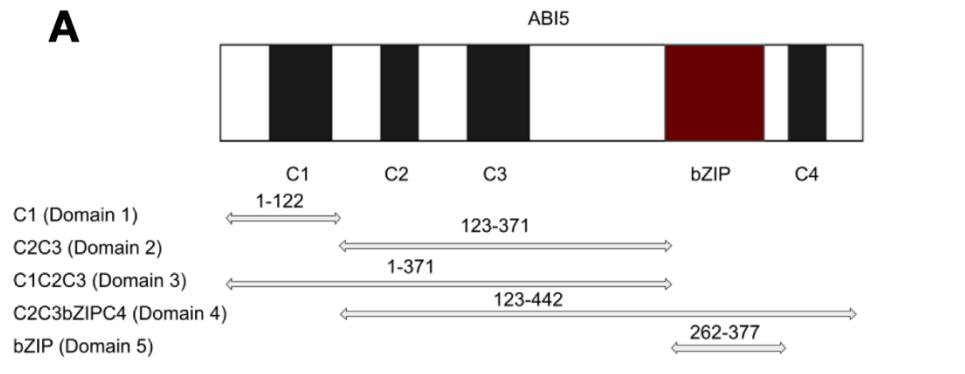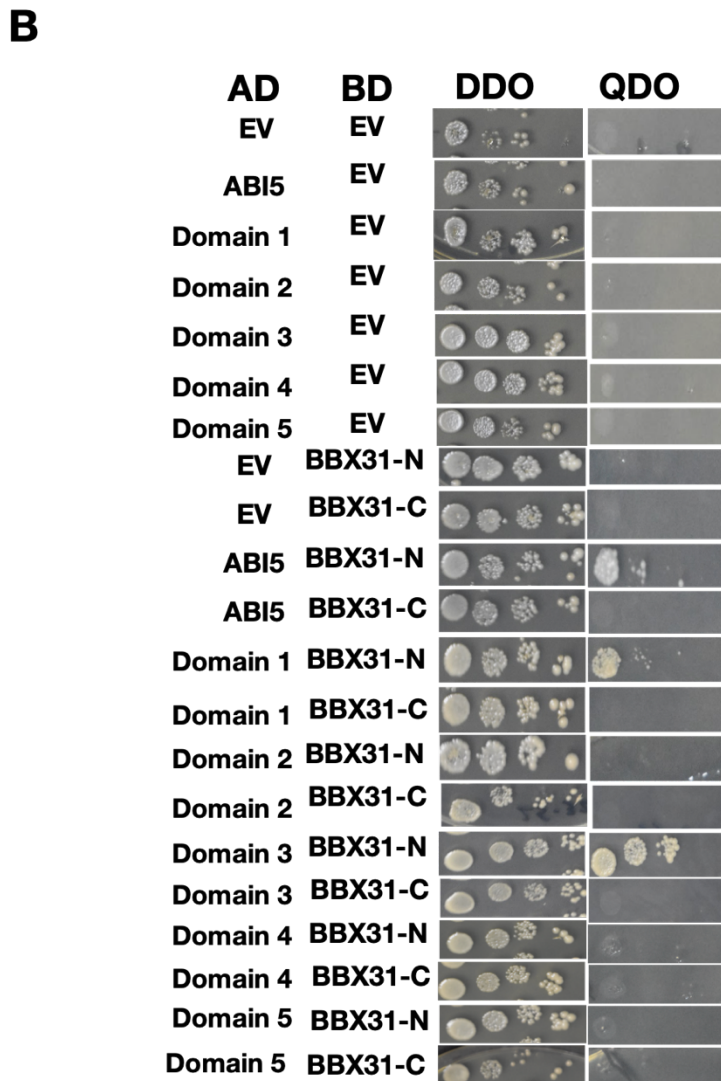

38

39 **Supplemental Figure S5. Yeast two hybrid showing interaction between different**  
 40 **domains of BBX31 and ABI5.**

41 A-B, Yeast two-hybrid assay showing the interaction between the N-terminal and C-terminal  
 42 domain of BBX31, full length ABI5 and different domains of ABI5. AD and BD represent the  
 43 GAL4 activation domain and binding domain. N terminal and C-terminal half of BBX31 are  
 44 fused to AD, while ABI5 and its domains were fused with BD domains and tested for  
 45 interaction. DDO represents the medium lacking leucine and tryptophan, while QDO  
 46 additionally lacks histidine and adenine.

47  
48  
49  
50

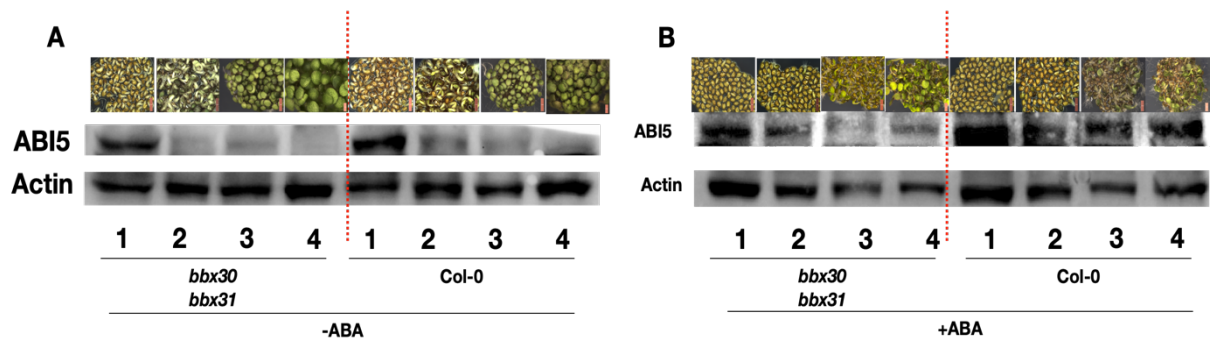

51  
52  
53  
54  
55  
56  
57  
58  
59  
60  
61  
62  
63  
64  
65  
66  
67  
68  
69  
70

### Supplemental Figure S6. BBX30 and BBX31 promote ABI5 accumulation upon ABA treatment

A-B, Immunoblot showing ABI5 accumulation in *bbx30 bbx31* and Col-0 in (A) -ABA and (B) +ABA conditions. Top row shows image of seeds/seedlings inoculated on 0.5x MS-sucrose plates with or without 1 $\mu$ M ABA. Samples were harvested at day 1, 2, 3, and 4 followed by immunoblotting using anti-ABI5 antibody. Actin was used as an internal control.

71

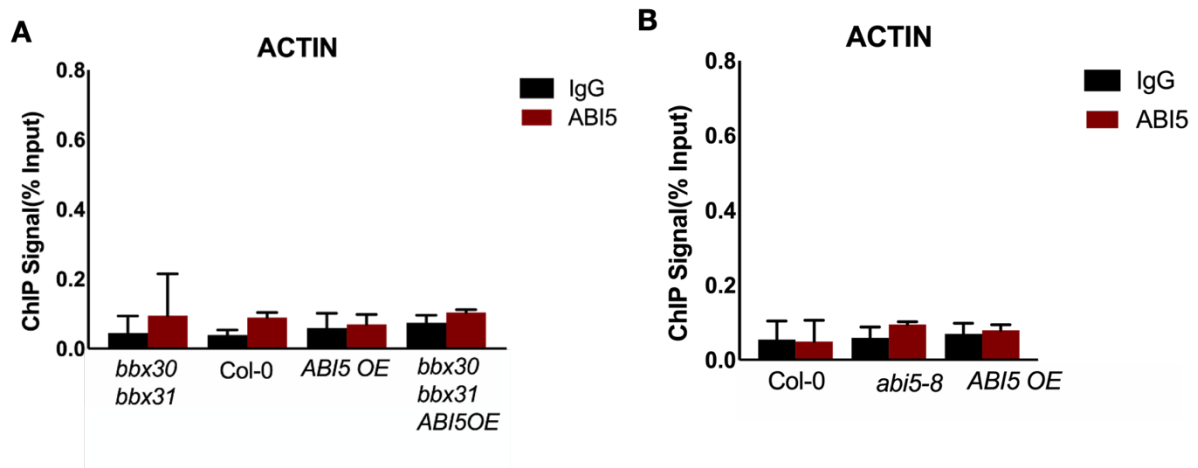

72

73

74 **Supplemental Figure S7. ChIP-qPCR showing the lack of *ACTIN* enrichment over *ABI5***

75 A-B, Experimental conditions were same as Figure 7, I and J and Figure 8, G and H. ChIP

76 DNA was quantified using *ACTIN* promoter specific primers.

77

78

79

80

81

82

83

84

85

86

87

88

89

90

91

92

93

94

95

96

97

98

99

100

101

102

**Supplemental Table S1. List of primers used in this study**

|                                                  |                                                         |
|--------------------------------------------------|---------------------------------------------------------|
| <b>Primers for gateway cloning</b>               |                                                         |
| BBX30 B1                                         | GGGGACAAGTTTGTACAAAAAGCAGGCTTCATGTGTAGAGGGTTTGAGAAAGAAG |
| BBX30 B2                                         | GGGGACCACCTTTGTACAAGAAAGCTGGGTTCGAGAAACCAAAGGGAATTTGTG  |
| BBX31 B1                                         | GGGGACAAGTTTGTACAAAAAGCAGGCTTAATGTGTAGAGGCTTGAATAATGA   |
| BBX31 B2                                         | GGGGACCACCTTTGTACAAGAAAGCTGGGTCTCAGAGAAAAACAAACGGAACC   |
| BBX31 NterminalB2                                | GGGGACCACCTTTGTACAAGAAAGCTGGGTTCGCGCTTACGTGTCTCCAAGCT   |
| BBX31 CterminalB1                                | GGGGACAAGTTTGTACAAAAAGCAGGCTTAGTGCTATGCACCTCTTGTGCAGA   |
| ABI5_Gw_F                                        | GGGGACAAGTTTGTACAAAAAGCAGGCTTCATGGTAACTAGAGAAACGAAGT    |
| ABI5_Gw_R                                        | GGGGACCACCTTTGTACAAGAAAGCTGGGTCTTAGAGTGGACAACCTCGGG     |
| <b>Primers for genotyping protein constructs</b> |                                                         |
| ABI5 FW                                          | CGCGAATTCATGGTAACTAGAGAAACGAAGTTG                       |
| ABI5 RW                                          | CGCCTCGAGTACAAGAAAGCTGGGTGTAGAG                         |
| BBX30 FW                                         | CGCGGATCCATGTGTAGAGGGTTTGAGAAAG                         |
| BBX30 RW                                         | CGCCTCGAGTCAGAGAAACCAAAGGGAATTTG                        |
| BBX31 FW                                         | CGCGGATCCATGTGTAGAGGCTTGAATAATGAAG                      |
| BBX31 RW                                         | CGCCTCGAGTCAGAGAAAAACAAACGGAACC                         |
| <b>Primers for EMSA</b>                          |                                                         |
| bbx31FW                                          | AAATAACAGGGCAAGATTCATCCACGTGCCAACAAACACAACACAAA         |
| bbx31 RW                                         | TTTGTGTTGTTGTTGTTGGACACGTGGATGAATCTTGCCTGTTATTT         |
| bbx31 mutFw                                      | AAATAACAGGGCAAGATTCATCCCGGGTCCAACAACAACAACACAAA         |
| bbx31 mut Rw                                     | TTTGTGTTGTTGTTGTTGGACCCGGTGATGAATCTTGCCTGTTATTT         |
| BBX30 Fw                                         | GTCATATTTTTCCACGTGTACAACCAAGTTTA                        |
| BBX30 Rw                                         | TAACTGGTTGTACACGTGGAAAAATTTGAC                          |
| BBX30 mutFw                                      | GTCATATTTTTCAAAAAATACAACCAAGTTTA                        |
| BBX30 mutRw                                      | TAACTGGTTGTATTTTTGGAAAAATTTGAC                          |
| EM6 FW                                           | AATAAAGTCAGACACGTGGCATGTCACCAA                          |
| EM6 RW                                           | TTGGTGACATGCCACGTGTCTGACTTTATT                          |
| ABI5 FW                                          | GCAAGAAACAGAGAGACACGTGCAGGACACGTGTCGCCGAGCCGAACGGA      |
| ABI5 RW                                          | TCCGTTCCGGCTGCGGACGACACGTGCTCCTGCACGTGCTCTTCTGTTTCTTGC  |
| <b>Primers for ChIP</b>                          |                                                         |
| BBX30 Fw                                         | GGAGGGAAAATAACTAAATTATTG                                |
| BBX30 Rw                                         | CTTGTGTTCAAGATTTAGGTTTA                                 |
| BBX31 Fw                                         | TGTGCGTCCAATATGAGGTC                                    |
| BBX31 Rw                                         | TGATGTGTTGTGTTGTGTTGTT                                  |
| ACTIN 8 Fw                                       | GCCTCTGTAATCAAAACCCCA                                   |
| ACTIN 8 Rv                                       | TCTTTTCGACAGGAACCCAATT                                  |
| EM1 ChIP Fw                                      | GGATTAAGATTAATCGGAGTCG                                  |
| EM1 ChIP Rw                                      | GTGGAAGAGAAGACGCGGCGAG                                  |
| EM6 ChIP Fw                                      | GCGGCGGTATAGTTAAGAACA                                   |
| EM6 ChIP Rw                                      | GATGATATACGAAGAAGACT                                    |
| <b>Primers for genotyping</b>                    |                                                         |
| LBb1.3                                           | ATTTTGCCGATTTTCGGAAC                                    |
| abi5-8- LP                                       | CAATGGAAGTTCGGAATCATG                                   |
| abi5-8 RP                                        | CACTCGTTTTCTCTTAAAGCG                                   |
| BBX31- CRISPR Fw                                 | GCAGAGAAGTGACGGAGGA                                     |
| BBX31- CRISPR Rv                                 | AGAAAAACAACGGAACCTCA                                    |
| BBX31- CRISPR FW                                 | GAAGAAGCGACAATGGAGGATG                                  |
| BBX31- CRISPR RW                                 | ACGAGTTAGCTTCCGACAGG                                    |
| <b>Primers for qPCR</b>                          |                                                         |
| ABI5_QF                                          | GAGAATGCGCAGCTAAAACA                                    |
| ABI5_QR                                          | GTGGACAACCTCGGGTTCCTC                                   |
| EM1_QF                                           | CGAGCTACTAGTGTCCGCTGCA                                  |
| EM1_QR                                           | GTA AACCAACCGGCAACCGCA                                  |
| EM6_QF                                           | CTTGTCTCCGGTGCTAAG                                      |
| EM6_QR                                           | CAACAGCATCTCGTGAAG                                      |
| UBQ10_QF                                         | GGCCTGTATAATCCCTGATGAATAAG                              |
| UBQ10_QR                                         | AAAGAGATAACAGGAACGGAACATAGT                             |
| BBX30_QF                                         | ATGTGTAGAGGGTTTGAGAAAGA                                 |
| BBX30_QR                                         | TGCGTCTGCCTACAATACA                                     |
| BBX31_QF                                         | ATGTGTAGAGGCTTGAATAATGAAGAG                             |
| BBX31_QR                                         | TCACATTTTCTACAGAGGAACGC                                 |

103  
104  
105

## Parsed Citations

- Albertos, P., Romero-Puertas, M.C., Tatematsu, K., Mateos, I., Sánchez-Vicente, I., Nambara, E., and Lorenzo, O. (2015).** S-nitrosylation triggers ABI5 degradation to promote seed germination and seedling growth. *Nature Communications* 6: 1–10.  
Google Scholar: [Author Only](#) [Title Only](#) [Author and Title](#)
- Ali, A., Pardo, J.M., and Yun, D.J. (2020).** Desensitization of ABA-Signaling: The Swing From Activation to Degradation. *Frontiers in Plant Science* 11.  
Google Scholar: [Author Only](#) [Title Only](#) [Author and Title](#)
- Komar, D.N., Mouriz, A., Jarillo, J.A., and Piñeiro, M. (2016).** Chromatin Immunoprecipitation Assay for the Identification of Arabidopsis Protein-DNA Interactions In Vivo. *JoVE* (107): e53422.  
Google Scholar: [Author Only](#) [Title Only](#) [Author and Title](#)
- Bai, M., Sun, J., Liu, J., Ren, H., Wang, K., Wang, Y., Wang, C., and Dehesh, K. (2019).** The B-box protein BBX19 suppresses seed germination via induction of ABI5. *Plant Journal* 99: 1192–1202.  
Google Scholar: [Author Only](#) [Title Only](#) [Author and Title](#)
- Bursch, K., Toledo-Ortiz, G., Pireyre, M., Lohr, M., Braatz, C., and Johansson, H. (2020).** Identification of BBX proteins as rate-limiting cofactors of HY5. *Nature Plants* 6: 921–928.  
Google Scholar: [Author Only](#) [Title Only](#) [Author and Title](#)
- Cao, J., Liang, Y., Yan, T., Wang, X., Zhou, H., Chen, C., Lin, F. et al. (2022).** The photomorphogenic repressors BBX28 and BBX29 integrate light and brassinosteroid signaling to inhibit seedling development in Arabidopsis. *Plant Cell* 34(6): 2266–2285.  
Google Scholar: [Author Only](#) [Title Only](#) [Author and Title](#)
- Carles, C., Bies-Etheve, N., Aspart, L., Léon-Kloosterziel, K.M., Koornneef, M., Echeverria, M., and Delseny, M. (2002).** Regulation of Arabidopsis thaliana Em genes: role of ABI5. *The Plant Journal* 30: 373–383.  
Google Scholar: [Author Only](#) [Title Only](#) [Author and Title](#)
- Chattopadhyay, S., Ang, L., Puente, P., Deng, X., and Wei, N. (1998).** Arabidopsis bZIP Protein HY5 Directly Interacts with Light-Responsive Promoters in Mediating Light Control of Gene Expression. 10: 673–683.  
Google Scholar: [Author Only](#) [Title Only](#) [Author and Title](#)
- Chen, H., Zhang, J., Neff, M.M., Hong, S.W., Zhang, H., Deng, X.W., and Xiong, L. (2008).** Integration of light and abscisic acid signaling during seed germination and early seedling development. *Proc Natl Acad Sci U S A* 105: 4495–4500.  
Google Scholar: [Author Only](#) [Title Only](#) [Author and Title](#)
- Choi, H.I., Hong, J.H., Ha, J.O., Kang, J.Y., and Kim, S.Y. (2000).** ABFs, a family of ABA-responsive element binding factors. *Journal of Biological Chemistry* 275: 1723–1730.  
Google Scholar: [Author Only](#) [Title Only](#) [Author and Title](#)
- Collin, A., Daszkowska-Golec, A., and Szarejko, I. (2021).** Updates on the role of ABSCISIC ACID INSENSITIVE 5 (ABI5) and ABSCISIC ACID-RESPONSIVE ELEMENT BINDING FACTORS (ABFs) in ABA signaling in different developmental stages in plants. *Cells* 10.  
Google Scholar: [Author Only](#) [Title Only](#) [Author and Title](#)
- Datta, S., Hettiarachchi, C., Johansson, H., and Holm, M. (2007).** SALT TOLERANCE HOMOLOG2, a B-Box Protein in Arabidopsis That Activates Transcription and Positively Regulates Light-Mediated Development. 19: 3242–3255.  
Google Scholar: [Author Only](#) [Title Only](#) [Author and Title](#)
- Deng, X.W., Caspar, T., and Quail, P.H. (1991).** cop1: A regulatory locus involved in light-controlled development and gene expression in Arabidopsis. *Genes and Development* 5: 1172–1182.  
Google Scholar: [Author Only](#) [Title Only](#) [Author and Title](#)
- Dolde, U., Rodrigues, V., Straub, D., Bhati, K.K., Choi, S., Yang, S.W., and Wenkel, S. (2018).** Synthetic MicroProteins: Versatile Tools for Posttranslational Regulation of Target Proteins. *Plant Physiology* 176: 3136–3145.  
Google Scholar: [Author Only](#) [Title Only](#) [Author and Title](#)
- Dong, J., Tang, D., Gao, Z., Yu, R., Li, K., He, H., Terzaghi, W., Deng, X.W., and Chen, H. (2014).** Arabidopsis DE-ETIOLATED1 represses photomorphogenesis by positively regulating phytochrome-interacting factors in the dark. *Plant Cell* 26: 3630–3645.  
Google Scholar: [Author Only](#) [Title Only](#) [Author and Title](#)
- Finkelstein, R.R. and Lynch, T.J. (2000).** The Arabidopsis abscisic acid response gene ABI5 encodes a basic leucine zipper transcription factor. *Plant Cell* 12: 599–609.  
Google Scholar: [Author Only](#) [Title Only](#) [Author and Title](#)
- Gampala, S.S. et al. (2007).** An Essential Role for 14-3-3 Proteins in Brassinosteroid Signal Transduction in Arabidopsis. *Developmental Cell* 13: 177–189.  
Google Scholar: [Author Only](#) [Title Only](#) [Author and Title](#)

**Gangappa, S.N. and Botto, J.F. (2014). The BBX family of plant transcription factors. Trends in Plant Science 19: 460–470.**

Google Scholar: [Author Only](#) [Title Only](#) [Author and Title](#)

**Gangappa, S.N., Crocco, C.D., Johansson, H., Datta, S., Hettiarachchi, C., Holm, M., and Botto, J.F. (2013a). The Arabidopsis B-BOX protein BBX25 interacts with HY5, negatively regulating BBX22 expression to suppress seedling photomorphogenesis. Plant Cell 25: 1243–57.**

Google Scholar: [Author Only](#) [Title Only](#) [Author and Title](#)

**Gangappa, S.N., Holm, M., and Botto, J.F. (2013b). Molecular interactions of BBX24 and BBX25 with HYH, HY5 HOMOLOG, to modulate Arabidopsis seedling development. Plant Signal Behav 8: 37–41.**

Google Scholar: [Author Only](#) [Title Only](#) [Author and Title](#)

**Graeff, M., Straub, D., Eguen, T., Dolde, U., Rodrigues, V., Brandt, R., and Wenkel, S. (2016). MicroProtein-Mediated Recruitment of CONSTANS into a TOPLESS Trimeric Complex Represses Flowering in Arabidopsis. PLoS Genetics 12: 1–22.**

Google Scholar: [Author Only](#) [Title Only](#) [Author and Title](#)

**Heng, Y., Lin, F., Jiang, Y., Ding, M., Yan, T., Lan, H., Zhou, H., Zhao, X., Xu, D., and Deng, X.W. (2019). B-box containing proteins bbx30 and bbx31, acting downstream of hy5, negatively regulate photomorphogenesis in arabidopsis. Plant Physiology 180: 497–508.**

Google Scholar: [Author Only](#) [Title Only](#) [Author and Title](#)

**Holtan, H.E. et al. (2011). BBX32, an Arabidopsis B-Box Protein, Functions in Light Signaling by Suppressing HY5-Regulated Gene Expression and Interacting with STH2/BBX21. PLANT PHYSIOLOGY 156: 2109–2123.**

Google Scholar: [Author Only](#) [Title Only](#) [Author and Title](#)

**Hong, S.-Y., Sun, B., Straub, D., Blaakmeer, A., Mineri, L., Koch, J., Brinch-Pedersen, H., Holme, I.B., Burow, M., Jørgen Lyngs Jørgensen, H., Mar Albà, M., and Wenkel, S. (2005). Heterologous microProtein expression identifies LITTLE NINJA, a dominant regulator of jasmonic acid signaling. PNAS 117: 26197–26205.**

Google Scholar: [Author Only](#) [Title Only](#) [Author and Title](#)

**Jiang, K., Sorefan, K., Deeks, M.J., Bevan, M.W., Hussey, P.J., and Hetherington, A.M. (2012). The ARP2/3 complex mediates guard cell actin reorganization and stomatal movement in Arabidopsis. Plant Cell 24: 2031–2040.**

Google Scholar: [Author Only](#) [Title Only](#) [Author and Title](#)

**Job, N. (2020). PIF3 / HY5 module regulates BBX11 to suppress protochlorophyllide levels in dark and promote photomorphogenesis in light. 1.**

Google Scholar: [Author Only](#) [Title Only](#) [Author and Title](#)

**Job, N., Yadukrishnan, P., Bursch, K., Datta, S., and Johansson, H. (2018). Two B-box proteins regulate photomorphogenesis by oppositely modulating HY5 through their diverse C-terminal domains. Plant Physiology 176: 2963–2976.**

Google Scholar: [Author Only](#) [Title Only](#) [Author and Title](#)

**Kang, X., Xu, G., Lee, B., Chen, C., Zhang, H., Kuang, R., and Ni, M. (2018). HRB2 and BBX21 interaction modulates Arabidopsis ABI5 locus and stomatal aperture. Plant Cell and Environment 41: 1912–1925.**

Google Scholar: [Author Only](#) [Title Only](#) [Author and Title](#)

**Kim, J., Kang, H., Park, J., Kim, W., Yoo, J., Lee, N., Kim, J., Yoon, T.-Y., and Choi, G. (2016). PIF1-Interacting Transcription Factors and Their Binding Sequence Elements Determine the in Vivo Targeting Sites of PIF1. Plant Cell 28: 1388–1405.**

Google Scholar: [Author Only](#) [Title Only](#) [Author and Title](#)

**Kruusvee, V., Toft, A.M., Aguida, B., Ahmad, M., and Wenkel, S. (2022). Stop CRYing! Inhibition of cryptochrome function by small proteins. Biochemical Society Transactions 50: 773–782.**

Google Scholar: [Author Only](#) [Title Only](#) [Author and Title](#)

**Kruusvee, V. and Wenkel, S. (2022). Microproteins - lost in translation. Nature Chemical Biology 18(6): 581-582**

Google Scholar: [Author Only](#) [Title Only](#) [Author and Title](#)

**Lau, O.S. and Deng, X.W. Plant hormone signaling lightens up : integrators of light and hormones. Current Opinion in Plant Biology 13: 571–577.**

Google Scholar: [Author Only](#) [Title Only](#) [Author and Title](#)

**Lee, J.-H., Yoon, H.-J., Terzaghi, W., Martinez, C., Dai, M., Li, J., Byun, M.-O., and Deng, X.W. (2010). DWA1 and DWA2, two Arabidopsis DWD protein components of CUL4-based E3 ligases, act together as negative regulators in ABA signal transduction. Plant Cell 22: 1716–1732.**

Google Scholar: [Author Only](#) [Title Only](#) [Author and Title](#)

**Leung, J. and Giraudat, J. (1998). Abscisic Acid Signal Transduction. Annual Review of Plant Physiology and Plant Molecular Biology 49: 199–222.**

Google Scholar: [Author Only](#) [Title Only](#) [Author and Title](#)



Lin, F., Jiang, Y., Li, J., Yan, T., Fan, L., Liang, J., Chen, Z.J., Xu, D., and Deng, X.W. (2018). B-BOX DOMAIN PROTEIN28 negatively regulates photomorphogenesis by repressing the activity of transcription factor hy5 and undergoes COP1-mediated degradation. *Plant Cell* 30: 2006–2019.

Google Scholar: [Author Only](#) [Title Only](#) [Author and Title](#)

Lopez-Molina, L., Mongrand, S., and Chua, N.H. (2001). A postgermination developmental arrest checkpoint is mediated by abscisic acid and requires the ABI5 transcription factor in Arabidopsis. *Proc Natl Acad Sci U S A* 98: 4782–4787.

Google Scholar: [Author Only](#) [Title Only](#) [Author and Title](#)

Lopez-Molina, L., Mongrand, S., Kinoshita, N., and Chua, N.H. (2003). AFP is a novel negative regulator of ABA signaling that promotes ABI5 protein degradation. *Genes and Development* 17: 410–418.

Google Scholar: [Author Only](#) [Title Only](#) [Author and Title](#)

Magnani, E., de Klein, N., Nam, H.I., Kim, J.G., Pham, K., Fiume, E., Mudgett, M.B., and Rhee, S.Y. (2014). A comprehensive analysis of microproteins reveals their potentially widespread mechanism of transcriptional regulation. *Plant Physiology* 165: 149–159.

Google Scholar: [Author Only](#) [Title Only](#) [Author and Title](#)

Maia, J., Dekkers, B.J.W., Dolle, M.J., Ligterink, W., and Hilhorst, H.W.M. (2014). Abscisic acid (ABA) sensitivity regulates desiccation tolerance in germinated Arabidopsis seeds. *New Phytologist* 203: 81–93.

Google Scholar: [Author Only](#) [Title Only](#) [Author and Title](#)

Min, J.H., Chung, J.S., Lee, K.H., and Kim, C.S. (2015). The CONSTANS-like 4 transcription factor, AtCOL4, positively regulates abiotic stress tolerance through an abscisic acid-dependent manner in Arabidopsis. *Journal of Integrative Plant Biology* 57: 313–324.

Google Scholar: [Author Only](#) [Title Only](#) [Author and Title](#)

Miura, K. and Hasegawa, P.M. (2009). Sumoylation and abscisic acid signaling. *Plant Signal Behav* 4: 1176–1178.

Google Scholar: [Author Only](#) [Title Only](#) [Author and Title](#)

Nakashima, K., Fujita, Y., Kanamori, N., Katagiri, T., Umezawa, T., Kidokoro, S., Maruyama, K., Yoshida, T., Ishiyama, K., Kobayashi, M., Shinozaki, K., and Yamaguchi-Shinozaki, K. (2009). Three Arabidopsis SnRK2 Protein Kinases, SRK2D/SnRK2.2, SRK2E/SnRK2.6/OST1 and SRK2I/SnRK2.3, Involved in ABA Signaling are Essential for the Control of Seed Development and Dormancy. *Plant and Cell Physiology* 50: 1345–1363.

Google Scholar: [Author Only](#) [Title Only](#) [Author and Title](#)

Nambara, E., Keith, K., McCourt, P., and Naito, S. (1995). A regulatory role for the ABI3 gene in the establishment of embryo maturation in Arabidopsis thaliana. *Development* 121: 629–636.

Google Scholar: [Author Only](#) [Title Only](#) [Author and Title](#)

Neff, M.M. and Volkenburgh, E. van (1994). Light-Stimulated Cotyledon Expansion in the.: 1433–1436.

Google Scholar: [Author Only](#) [Title Only](#) [Author and Title](#)

Ng, L.M., Melcher, K., Teh, B.T., and Xu, H.E. (2014). Abscisic acid perception and signaling: structural mechanisms and applications. *Acta Pharmacologica Sinica* 35: 567–584.

Google Scholar: [Author Only](#) [Title Only](#) [Author and Title](#)

Penfield, S., Josse, E.M., and Halliday, K.J. (2010). A role for an alternative splice variant of PIF6 in the control of Arabidopsis primary seed dormancy. *Plant Molecular Biology* 73: 89–95.

Google Scholar: [Author Only](#) [Title Only](#) [Author and Title](#)

**Peng, J., Wang, M., Wang, X., Qi, L., Guo, C., Hong Li, Cong Li et al. (2022). COP1 positively**

**regulates ABA signaling during Arabidopsis seedling growth in darkness by mediating ABA-induced ABI5 accumulation. *Plant Cell* 34(6): 2286-2308.**

**Qi, Lijuan, Shan Liu, Cong Li, Jingying Fu, Yanjun Jing, Jinkui Cheng, Hong Li et al. (2020)**

**PHYTOCHROME-INTERACTING FACTORS interact with the ABA receptors PYL8 and PYL9 to orchestrate ABA signaling in darkness. *Molecular Plant*, 13(3): 414-430.**

Ravindran, N., Ramachandran, H., Job, N., Yadav, A., Vaishak, K.P., and Datta, S. (2021). B-box protein BBX32 integrates light and brassinosteroid signals to inhibit cotyledon opening. *Plant Physiology*: 1–16.

Google Scholar: [Author Only](#) [Title Only](#) [Author and Title](#)

Rodrigues, V.L., Dolde, U., Sun, B., Blaakmeer, A., Straub, D., Eguen, T., Botterweg-Paredes, E., Hong, S., Graeff, M., Li, M.W., Gendron, J.M., and Wenkel, S. (2021). A microProtein repressor complex in the shoot meristem controls the transition to flowering. *Plant Physiology* 187: 187–202.

Google Scholar: [Author Only](#) [Title Only](#) [Author and Title](#)

**Sakuraba, Y., Jeong, J., Kang, M., Kim, J., Paek, N., and Choi, G. (2014). and PIF5 induce leaf senescence in Arabidopsis.**

- Saleh, A., Alvarez-Venegas, R., and Avramova, Z. (2008).** An efficient chromatin immunoprecipitation (ChIP) protocol for studying histone modifications in Arabidopsis plants. *Nature Protocols* 3: 1018–1025.  
Google Scholar: [Author Only](#) [Title Only](#) [Author and Title](#)
- Sheen, J. (2002).** A Transient Expression Assay Using Arabidopsis Mesophyll Protoplasts A. Protoplast Isolation. *Plant Cell*: 1–6.  
Google Scholar: [Author Only](#) [Title Only](#) [Author and Title](#)
- Shi, H., Zhong, S., Mo, X., Liu, N., Nezames, C.D., and Deng, X.W. (2013).** HFR1 sequesters PIF1 to govern the transcriptional network underlying light-initiated seed germination in Arabidopsis. *Plant Cell* 25: 3770–3784.  
Google Scholar: [Author Only](#) [Title Only](#) [Author and Title](#)
- Shu, K., Luo, X., Meng, Y., and Yang, W. (2018).** Toward a Molecular Understanding of Abscisic Acid Actions in Floral Transition. *Plant and Cell Physiology* 59: 215–221.  
Google Scholar: [Author Only](#) [Title Only](#) [Author and Title](#)
- Song, Z., Bian, Y., Liu, J., Sun, Y., and Xu, D. (2020a).** B-box proteins: Pivotal players in light-mediated development in plants. *Journal of Integrative Plant Biology* 62: 1293–1309.  
Google Scholar: [Author Only](#) [Title Only](#) [Author and Title](#)
- Song, Z., Yan, T., Liu, J., Bian, Y., Heng, Y., Lin, F., Jiang, Y., and Deng, X.W. (2020).** BBX28 / BBX29 , HY5 and BBX30 / 31 form a feedback loop to fine-tune photomorphogenic development. 1: 377–390.  
Google Scholar: [Author Only](#) [Title Only](#) [Author and Title](#)
- Staudt, A.C. and Wenkel, S. (2011).** Regulation of protein function by "microProteins." *EMBO Reports* 12: 35–42.  
Google Scholar: [Author Only](#) [Title Only](#) [Author and Title](#)
- Stone, S.L., Williams, L.A., Farmer, L.M., Vierstra, R.D., and Callis, J. (2006).** KEEP ON GOING, a RING E3 ligase essential for Arabidopsis growth and development, is involved in abscisic acid signaling. *Plant Cell* 18: 3415–3428.  
Google Scholar: [Author Only](#) [Title Only](#) [Author and Title](#)
- Tang, W., Ji, Q., Huang, Y., Jiang, Z., Bao, M., Wang, H., and Lin, R. (2013).** FAR-RED ELONGATED HYPOCOTYL3 and FAR-RED IMPAIRED RESPONSE1 transcription factors integrate light and abscisic acid signaling in Arabidopsis. *Plant Physiology* 163: 857–866.  
Google Scholar: [Author Only](#) [Title Only](#) [Author and Title](#)
- Tezuka, K., Taji, T., Hayashi, T., and Sakata, Y. (2013).** A novel abi5 allele reveals the importance of the conserved Ala in the C3 domain for regulation of downstream genes and salt tolerance during germination in Arabidopsis. *Plant Signaling & Behavior* 8: e23455.  
Google Scholar: [Author Only](#) [Title Only](#) [Author and Title](#)
- Tollis, S., Singh, J., Palou, R., Thattikota, Y., Ghazal, G., Coulombe-Huntington, J., Tang, X., Moore, S., Blake, D., Bonneil, E., Royer, CA, Thibault, P., Tyers, M. (2022).** The microprotein Nrs1 rewires the G1/S transcriptional machinery during nitrogen limitation in budding yeast. *PLoS Biology* 20 (3): e3001548.  
Google Scholar: [Author Only](#) [Title Only](#) [Author and Title](#)
- Tuteja, N. (2007).** Abscisic Acid and Abiotic Stress Signaling. *Plant Signaling & Behavior* 2: 135–138.  
Google Scholar: [Author Only](#) [Title Only](#) [Author and Title](#)
- Vaishak, K.P., Yadukrishnan, P., Bakshi, S., Kushwaha, A.K., Ramachandran, H., Job, N., Babu, D., and Datta, S. (2019).** The B-box bridge between light and hormones in plants. *Journal of Photochemistry and Photobiology B: Biology* 191: 164–174.  
Google Scholar: [Author Only](#) [Title Only](#) [Author and Title](#)
- Weitbrecht, K., Müller, K., and Leubner-Metzger, G. (2011).** First off the mark: Early seed germination. *Journal of Experimental Botany* 62: 3289–3309.  
Google Scholar: [Author Only](#) [Title Only](#) [Author and Title](#)
- Wu, Q., Kuang, K., Lyu, M., Zhao, Y., Li, Y., Li, J., Pan, Y., Shi, H., and Zhong, S. (2020).** Allosteric deactivation of PIFs and EIN3 by microproteins in light control of plant development. *Proc Natl Acad Sci U S A* 117: 18858–18868.  
Google Scholar: [Author Only](#) [Title Only](#) [Author and Title](#)
- Xiong, L., Schumaker, K.S., and Zhu, J.-K. (2002).** Cell Signaling during Cold, Drought, and Salt Stress. *The Plant Cell* 14: S165–S183.  
Google Scholar: [Author Only](#) [Title Only](#) [Author and Title](#)
- Xu, D., Li, J., Gangappa, S.N., Hettiarachchi, C., Lin, F., Andersson, M.X., Jiang, Y., Deng, X.W., and Holm, M. (2014).** Convergence of Light and ABA Signaling on the ABI5 Promoter. *PLoS Genetics* 10: e1004197.  
Google Scholar: [Author Only](#) [Title Only](#) [Author and Title](#)
- Xu, X., Wan, W., Jiang, G., Xi, Y., Huang, H., Cai, J., Chang, Y., Duan, C.G., Mangrauthia, S.K., Peng, X., Zhu, J.K., and Zhu, G. (2019).** Nucleocytoplasmic Trafficking of the Arabidopsis WD40 Repeat Protein XIW1 Regulates ABI5 Stability and Abscisic Acid

**Responses. Molecular Plant 12: 1598–1611.**

Google Scholar: [Author Only](#) [Title Only](#) [Author and Title](#)

**Yadav, A, Bakshi, S., Yadukrishnan, P., Lingwan, M., Dolde, U., Wenkel, S., Masakapalli, S.K., and Datta, S. (2019a). The B-Box-containing microprotein miP1a/BBX31 regulates photomorphogenesis and UV-B protection. *Plant Physiol* 179: 1876–1892.**

Google Scholar: [Author Only](#) [Title Only](#) [Author and Title](#)

**Yadav, A, Bakshi, S., Yadukrishnan, P., Lingwan, M., Dolde, U., Wenkel, S., Masakapalli, S.K., and Datta, S. (2019b). The B-box-containing microprotein miP1a/BBX31 regulates photomorphogenesis and UV-B protection. *Plant Physiology* 179: 1876–1892.**

Google Scholar: [Author Only](#) [Title Only](#) [Author and Title](#)

**Yadav, A, Ravindran, N., Singh, D., Rahul, P.V., and Datta, S. (2020a). Role of Arabidopsis BBX proteins in light signaling. *Journal of Plant Biochemistry and Biotechnology* 29: 623–635.**

Google Scholar: [Author Only](#) [Title Only](#) [Author and Title](#)

**Yadav, A, Singh, D., Lingwan, M., Yadukrishnan, P., Masakapalli, S.K., and Datta, S. (2020). Light signaling and UV-B mediated plant growth regulation. *Journal of Integrative Plant Biology*.**

Google Scholar: [Author Only](#) [Title Only](#) [Author and Title](#)

**Yadukrishnan, P. and Datta, S. (2021). Light and abscisic acid interplay in early seedling development. *New Phytologist* 229: 763–769.**

Google Scholar: [Author Only](#) [Title Only](#) [Author and Title](#)

**Yadukrishnan, P., Job, N., Johansson, H., Datta, S., Job, N., and Johansson, H. (2018). Opposite roles of group IV BBX proteins : Exploring missing links between structural and functional diversity. *Plant Signaling & Behavior* 13(8): 1–3.**

Google Scholar: [Author Only](#) [Title Only](#) [Author and Title](#)

**Yadukrishnan, P., Rahul, P.V., and Datta, S. (2020a). HY5 Suppresses, Rather Than Promotes, Abscisic Acid-Mediated Inhibition of Postgermination Seedling Development. *Plant Physiology* 184: 574–578.**

Google Scholar: [Author Only](#) [Title Only](#) [Author and Title](#)

**Yadukrishnan, P., Rahul, P.V., Ravindran, N., Bursch, K., Johansson, H., and Datta, S. (2020). CONSTITUTIVELY PHOTOMORPHOGENIC1 promotes ABA-mediated inhibition of post-germination seedling establishment. *Plant Journal* 103: 481–496.**

Google Scholar: [Author Only](#) [Title Only](#) [Author and Title](#)
